# Supplementary material
Source: PubMed Central journal article supplement (PMC4161940)
Supplement: 11306_2013_580_MOESM1_ESM.pdf [file 11306_2013_580_MOESM1_ESM.pdf]

Integration of transcriptomics and  
metabonomics - improving diagnostics,  
biomarker identification and phenotyping in  
ulcerative colitis - Supplementary material

April 16, 2013

# 1 Prediction results -logistic regression fitted by Lasso (i.e. including variable selection)

## 1.1 ActiveControl

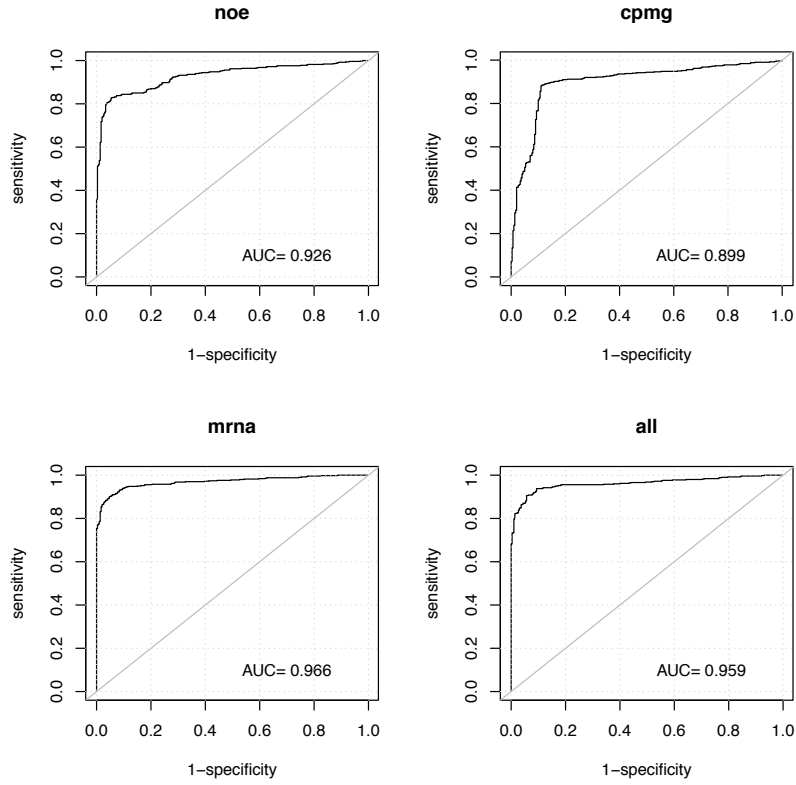

Figure 1: Prediction (logistic regression fitted by lasso) performance for “activeControl” analysis. ROC curves for each data set.

|       | Name               | HGNC   | Ppm | Data set | Selection freq. |
|-------|--------------------|--------|-----|----------|-----------------|
| 14301 | ENSG00000180616_at | SSTR2  |     | mrna     | 0.65            |
| 11504 | ENSG00000165188_at | RNF183 |     | mrna     | 0.59            |
| 10703 | ENSG00000162174_at | ASRGL1 |     | mrna     | 0.5             |
| 14514 | ENSG00000182240_at | BACE2  |     | mrna     | 0.39            |
| 911   | ENSG00000014257_at | ACPP   |     | mrna     | 0.34            |
| 1638  | ENSG00000070081_at | NUCB2  |     | mrna     | 0.33            |
| 13932 | ENSG00000178078_at | STAP2  |     | mrna     | 0.32            |
| 14507 | ENSG00000182199_at | SHMT2  |     | mrna     | 0.27            |
| 5216  | ENSG00000118523_at | CTGF   |     | mrna     | 0.26            |
| 15134 | ENSG00000185624_at | P4HB   |     | mrna     | 0.22            |
| 9641  | ENSG00000152454_at | ZNF256 |     | mrna     | 0.19            |

|       |                    |         |             |      |      |
|-------|--------------------|---------|-------------|------|------|
| 3438  | ENSG00000104870_at | FCGRT   |             | mrna | 0.18 |
| 5339  | ENSG00000119777_at | TMEM214 |             | mrna | 0.18 |
| 12405 | ENSG00000169071_at | ROR2    |             | mrna | 0.17 |
| 936   | ENSG00000017483_at | SLC38A5 |             | mrna | 0.16 |
| 10117 | ENSG00000157020_at | SEC13   |             | mrna | 0.15 |
| 3285  | ENSG00000103502_at | CDIPT   |             | mrna | 0.14 |
| 5651  | ENSG00000122585_at | NPY     |             | mrna | 0.14 |
| 1547  | ENSG00000067225_at | PKM2    |             | mrna | 0.13 |
| 8412  | ENSG00000142178_at | SIK1    |             | mrna | 0.13 |
| 16336 | ENSG00000198363_at | ASPH    |             | mrna | 0.13 |
| 1476  | ENSG00000065485_at | PDIA5   |             | mrna | 0.12 |
| 419   | aspartate          |         | 2.674261917 | noe  | 0.11 |
| 2215  | ENSG00000086548_at | CEACAM6 |             | mrna | 0.11 |
| 4513  | ENSG00000112759_at | SLC29A1 |             | mrna | 0.11 |
| 6405  | ENSG00000128918_at | ALDH1A2 |             | mrna | 0.11 |
| 6472  | ENSG00000129538_at | RNASE1  |             | mrna | 0.11 |
| 9279  | ENSG00000148926_at | ADM     |             | mrna | 0.11 |

Table 1: selected variables (active control, combined data set)

|       | Name               | HGNC    | Selection freq. |
|-------|--------------------|---------|-----------------|
| 13737 | ENSG00000180616_at | SSTR2   | 0.58            |
| 10139 | ENSG00000162174_at | ASRGL1  | 0.55            |
| 10940 | ENSG00000165188_at | RNF183  | 0.55            |
| 347   | ENSG00000014257_at | ACPP    | 0.39            |
| 1074  | ENSG00000070081_at | NUCB2   | 0.38            |
| 13368 | ENSG00000178078_at | STAP2   | 0.36            |
| 14570 | ENSG00000185624_at | P4HB    | 0.32            |
| 13950 | ENSG00000182240_at | BACE2   | 0.27            |
| 4992  | ENSG00000121690_at | DEPDC7  | 0.22            |
| 4652  | ENSG00000118523_at | CTGF    | 0.2             |
| 13943 | ENSG00000182199_at | SHMT2   | 0.2             |
| 15772 | ENSG00000198363_at | ASPH    | 0.17            |
| 2874  | ENSG00000104870_at | FCGRT   | 0.16            |
| 5087  | ENSG00000122585_at | NPY     | 0.14            |
| 372   | ENSG00000017483_at | SLC38A5 | 0.13            |
| 9077  | ENSG00000152454_at | ZNF256  | 0.12            |

Table 2: selected variables (active control, mrna data set)

|     | Name        | Ppm         | Selection freq. |
|-----|-------------|-------------|-----------------|
| 97  | gpc         | 3.225218334 | 0.96            |
| 100 | taurine     | 3.252754895 | 0.77            |
| 74  | aspartate   | 2.674261917 | 0.68            |
| 98  |             | 3.239711261 | 0.51            |
| 80  |             | 2.828531781 | 0.37            |
| 73  |             | 2.657284529 | 0.35            |
| 63  | glutathione | 2.533525729 | 0.32            |
| 77  | aspartate   | 2.78947264  | 0.27            |
| 107 |             | 3.612395741 | 0.23            |
| 4   |             | 0.920966247 | 0.18            |
| 102 |             | 3.280717718 | 0.18            |
| 106 |             | 3.592624177 | 0.15            |
| 11  | valine      | 0.987778095 | 0.13            |
| 16  | lipid       | 1.281397504 | 0.12            |

Table 3: selected variables (active control, noe data set)

|     | Name       | Ppm         | Selection freq. |
|-----|------------|-------------|-----------------|
| 173 | gpc        | 3.225067352 | 0.78            |
| 191 |            | 3.68024848  | 0.74            |
| 176 | taurine    | 3.252896929 | 0.7             |
| 275 |            | 4.656456115 | 0.47            |
| 192 |            | 3.689158497 | 0.21            |
| 174 |            | 3.240746725 | 0.18            |
| 4   | isoleucine | 0.92261137  | 0.16            |
| 86  | glutamate  | 2.333058477 | 0.14            |
| 128 | aspartate  | 2.786412373 | 0.14            |

Table 4: selected variables (active control, cpqm data set)

## 1.2 InactiveActive

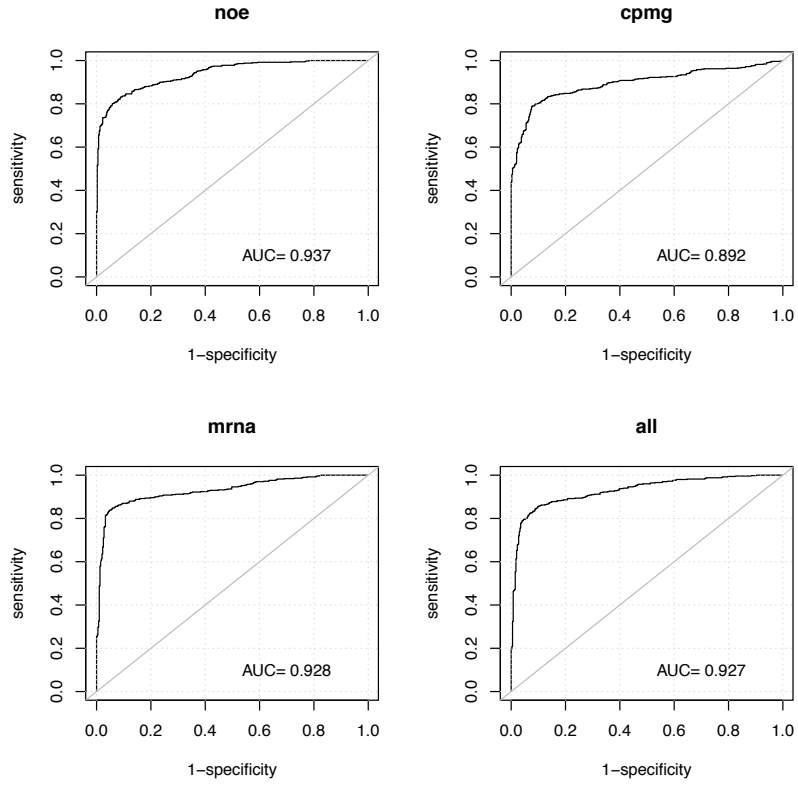

Figure 2: Prediction (logistic regression fitted by lasso) performance for “InactiveActive” analysis. ROC curves for each data set.

|       | Name               | HGNC     | Ppm | Data set | Selection freq. |
|-------|--------------------|----------|-----|----------|-----------------|
| 19736 | ENSG00000257512_at |          |     | mrna     | 0.55            |
| 12663 | ENSG00000170419_at | VSTM2A   |     | mrna     | 0.47            |
| 3550  | ENSG00000105404_at | RABAC1   |     | mrna     | 0.4             |
| 1325  | ENSG00000057704_at | TMCC3    |     | mrna     | 0.37            |
| 1950  | ENSG00000078401_at | EDN1     |     | mrna     | 0.37            |
| 15907 | ENSG00000196660_at | SLC30A10 |     | mrna     | 0.37            |
| 7251  | ENSG00000134910_at | STT3A    |     | mrna     | 0.36            |
| 6715  | ENSG00000131174_at | COX7B    |     | mrna     | 0.34            |
| 15147 | ENSG00000185670_at | ZBTB3    |     | mrna     | 0.34            |
| 13007 | ENSG00000172023_at | REG1B    |     | mrna     | 0.33            |
| 4239  | ENSG00000110799_at | VWF      |     | mrna     | 0.29            |

|       |                    |          |             |      |      |
|-------|--------------------|----------|-------------|------|------|
| 652   | ENSG00000005238_at | KIAA1539 |             | mrna | 0.24 |
| 4536  | ENSG00000112977_at | DAP      |             | mrna | 0.23 |
| 8888  | ENSG00000145675_at | PIK3R1   |             | mrna | 0.23 |
| 10858 | ENSG00000162909_at | CAPN2    |             | mrna | 0.22 |
| 3030  | ENSG00000101665_at | SMAD7    |             | mrna | 0.21 |
| 5499  | ENSG00000120963_at | ZNF706   |             | mrna | 0.21 |
| 10895 | ENSG00000163053_at | SLC16A14 |             | mrna | 0.19 |
| 16531 | ENSG00000198856_at | OSTC     |             | mrna | 0.19 |
| 202   |                    |          | 3.742516185 | cpmg | 0.18 |
| 1067  | ENSG00000034533_at | ASTE1    |             | mrna | 0.18 |
| 8485  | ENSG00000142748_at | FCN3     |             | mrna | 0.18 |
| 2930  | ENSG00000101189_at | C20orf20 |             | mrna | 0.16 |
| 1638  | ENSG00000070081_at | NUCB2    |             | mrna | 0.15 |
| 14514 | ENSG00000182240_at | BACE2    |             | mrna | 0.15 |
| 18908 | ENSG00000244038_at | DDOST    |             | mrna | 0.15 |
| 911   | ENSG00000014257_at | ACPP     |             | mrna | 0.14 |
| 11382 | ENSG00000164683_at | HEY1     |             | mrna | 0.14 |
| 13225 | ENSG00000173269_at | MMRN2    |             | mrna | 0.14 |
| 2918  | ENSG00000101150_at | TPD52L2  |             | mrna | 0.13 |
| 8412  | ENSG00000142178_at | SIK1     |             | mrna | 0.13 |
| 13280 | ENSG00000173598_at | NUDT4    |             | mrna | 0.11 |

Table 5: selected variables (inactive active, combined data set)

|       | Name               | HGNC     | Selection freq. |
|-------|--------------------|----------|-----------------|
| 19172 | ENSG00000257512_at |          | 0.63            |
| 15343 | ENSG00000196660_at | SLC30A10 | 0.46            |
| 6151  | ENSG00000131174_at | COX7B    | 0.41            |
| 6687  | ENSG00000134910_at | STT3A    | 0.39            |
| 12099 | ENSG00000170419_at | VSTM2A   | 0.39            |
| 2986  | ENSG00000105404_at | RABAC1   | 0.37            |
| 12443 | ENSG00000172023_at | REG1B    | 0.37            |
| 761   | ENSG00000057704_at | TMCC3    | 0.35            |
| 1386  | ENSG00000078401_at | EDN1     | 0.35            |
| 88    | ENSG00000005238_at | KIAA1539 | 0.34            |
| 10294 | ENSG00000162909_at | CAPN2    | 0.34            |
| 4935  | ENSG00000120963_at | ZNF706   | 0.32            |
| 7921  | ENSG00000142748_at | FCN3     | 0.28            |
| 3972  | ENSG00000112977_at | DAP      | 0.26            |
| 14583 | ENSG00000185670_at | ZBTB3    | 0.26            |

|       |                    |          |      |
|-------|--------------------|----------|------|
| 2366  | ENSG00000101189_at | C20orf20 | 0.25 |
| 3675  | ENSG00000110799_at | VWF      | 0.25 |
| 10331 | ENSG00000163053_at | SLC16A14 | 0.22 |
| 8324  | ENSG00000145675_at | PIK3R1   | 0.19 |
| 11737 | ENSG00000168575_at | SLC20A2  | 0.17 |
| 503   | ENSG00000034533_at | ASTE1    | 0.16 |
| 2466  | ENSG00000101665_at | SMAD7    | 0.16 |
| 10818 | ENSG00000164683_at | HEY1     | 0.16 |
| 13950 | ENSG00000182240_at | BACE2    | 0.16 |
| 9553  | ENSG00000157020_at | SEC13    | 0.15 |
| 9792  | ENSG00000159128_at | IFNGR2   | 0.14 |
| 12896 | ENSG00000174807_at | CD248    | 0.14 |
| 15967 | ENSG00000198856_at | OSTC     | 0.14 |
| 18344 | ENSG00000244038_at | DDOST    | 0.14 |
| 1125  | ENSG00000071243_at | ING3     | 0.13 |
| 2382  | ENSG00000101224_at | CDC25B   | 0.13 |
| 4344  | ENSG00000115963_at | RND3     | 0.12 |
| 9442  | ENSG00000156030_at | C14orf43 | 0.12 |
| 11055 | ENSG00000165702_at | GFI1B    | 0.12 |
| 12661 | ENSG00000173269_at | MMRN2    | 0.12 |
| 9251  | ENSG00000154122_at | ANKH     | 0.11 |
| 10766 | ENSG00000164442_at | CITED2   | 0.11 |
| 12092 | ENSG00000170381_at | SEMA3E   | 0.11 |
| 12716 | ENSG00000173598_at | NUDT4    | 0.11 |

Table 6: selected variables (inactive active, mrna data set)

|     | Name            | Ppm         | Selection freq. |
|-----|-----------------|-------------|-----------------|
| 100 | taurine         | 3.252754895 | 0.85            |
| 74  | aspartate       | 2.674261917 | 0.82            |
| 97  | gpc             | 3.225218334 | 0.69            |
| 139 | myo-inositol    | 4.046452197 | 0.69            |
| 98  |                 | 3.239711261 | 0.61            |
| 116 |                 | 3.737919525 | 0.52            |
| 112 |                 | 3.712430882 | 0.49            |
| 191 |                 | 6.507960949 | 0.34            |
| 103 | scyllo-inositol | 3.335121944 | 0.31            |
| 113 |                 | 3.719207131 | 0.31            |
| 14  | valine          | 1.029642612 | 0.3             |
| 138 | myo-inositol    | 4.039501879 | 0.29            |



|     |           |             |      |
|-----|-----------|-------------|------|
| 135 |           | 4.005477649 | 0.22 |
| 107 |           | 3.612395741 | 0.21 |
| 207 |           | 8.17223717  | 0.16 |
| 106 |           | 3.592624177 | 0.15 |
| 200 |           | 7.397806116 | 0.15 |
| 48  | lipid     | 2.253171801 | 0.14 |
| 118 |           | 3.750663847 | 0.14 |
| 203 |           | 7.869591075 | 0.14 |
| 211 |           | 8.253616906 | 0.14 |
| 53  | glutamate | 2.33901612  | 0.12 |

Table 7: selected variables (inactive active, noe data set)

|     | Name            | Ppm         | Selection freq. |
|-----|-----------------|-------------|-----------------|
| 176 | taurine         | 3.252896929 | 0.77            |
| 183 | scyllo-inositol | 3.334861322 | 0.65            |
| 202 |                 | 3.742516185 | 0.65            |
| 79  |                 | 2.269194746 | 0.6             |
| 173 | gpc             | 3.225067352 | 0.55            |
| 42  |                 | 1.880897982 | 0.54            |
| 104 |                 | 2.508036326 | 0.5             |
| 134 |                 | 2.855230444 | 0.46            |
| 149 |                 | 3.005623611 | 0.43            |
| 292 |                 | 5.897989325 | 0.43            |
| 168 |                 | 3.175844955 | 0.42            |
| 118 | aspartate       | 2.644782678 | 0.41            |
| 83  |                 | 2.299460478 | 0.4             |
| 178 | taurine         | 3.278200138 | 0.39            |
| 318 |                 | 7.347346035 | 0.36            |
| 152 |                 | 3.042576182 | 0.34            |
| 206 |                 | 3.761894842 | 0.33            |
| 227 |                 | 3.996872536 | 0.33            |
| 341 |                 | 8.693240002 | 0.3             |
| 120 | aspartate       | 2.673924337 | 0.27            |
| 293 |                 | 5.9012133   | 0.25            |
| 169 |                 | 3.188072049 | 0.23            |
| 338 |                 | 8.252995481 | 0.22            |
| 281 | glucose         | 5.23140479  | 0.21            |
| 175 |                 | 3.246623599 | 0.2             |
| 275 |                 | 4.656456115 | 0.2             |

|     |              |             |      |
|-----|--------------|-------------|------|
| 190 |              | 3.612459587 | 0.18 |
| 289 |              | 5.79678976  | 0.17 |
| 304 |              | 6.089434715 | 0.17 |
| 65  | glutamine    | 2.128764526 | 0.16 |
| 196 |              | 3.7126113   | 0.16 |
| 255 |              | 4.28480121  | 0.16 |
| 286 | glycogen     | 5.424593506 | 0.15 |
| 86  | glutamate    | 2.333058477 | 0.14 |
| 92  |              | 2.384329941 | 0.13 |
| 29  |              | 1.611793593 | 0.12 |
| 35  |              | 1.680144048 | 0.12 |
| 235 | myo-inositol | 4.046572122 | 0.12 |
| 191 |              | 3.68024848  | 0.11 |
| 280 | glucose      | 5.212160888 | 0.11 |
| 323 |              | 7.433508139 | 0.11 |

Table 8: selected variables (inactive active, cpmg data set)

### 1.3 InactiveControl

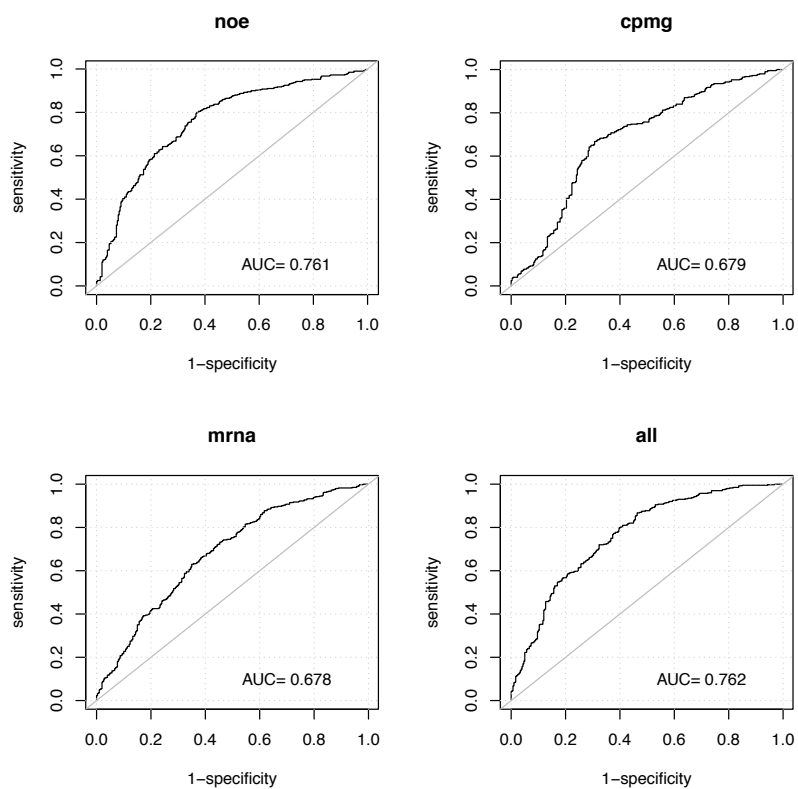

Figure 3: Prediction (logistic regression fitted by lasso) performance for “InactiveControl” analysis. ROC curves for each data set.

|       | Name               | HGNC     | Ppm         | Data set | Selection freq. |
|-------|--------------------|----------|-------------|----------|-----------------|
| 18865 | ENSG00000243024_at | RPS11P6  | 3.175844955 | mrna     | 0.81            |
| 168   |                    |          |             | cpmg     | 0.77            |
| 11605 | ENSG00000165669_at | FAM204A  |             | mrna     | 0.69            |
| 5527  | ENSG00000121351_at | IAPP     |             | mrna     | 0.55            |
| 5454  | ENSG00000120675_at | DNAJC15  |             | mrna     | 0.5             |
| 2845  | ENSG00000100664_at | EIF5     |             | mrna     | 0.48            |
| 6400  | ENSG00000128881_at | TTBK2    |             | mrna     | 0.47            |
| 5032  | ENSG00000116885_at | OSCP1    |             | mrna     | 0.46            |
| 11760 | ENSG00000166323_at | C11orf65 | 3.092754442 | mrna     | 0.31            |
| 156   |                    |          |             | cpmg     | 0.29            |
| 10372 | ENSG00000159208_at | C1orf51  |             | mrna     | 0.29            |

|       |                    |         |             |      |      |
|-------|--------------------|---------|-------------|------|------|
| 5293  | ENSG00000119487_at | MAPKAP1 |             | mrna | 0.27 |
| 11284 | ENSG00000164291_at | ARSK    |             | mrna | 0.26 |
| 12952 | ENSG00000171786_at | NHLH1   |             | mrna | 0.23 |
| 16434 | ENSG00000198590_at | C3orf35 |             | mrna | 0.17 |
| 1245  | ENSG00000051620_at | HEBP2   |             | mrna | 0.15 |
| 13574 | ENSG00000175550_at | DRAP1   |             | mrna | 0.14 |
| 5651  | ENSG00000122585_at | NPY     |             | mrna | 0.13 |
| 6774  | ENSG00000131697_at | NPHP4   |             | mrna | 0.12 |
| 425   |                    |         | 2.828531781 | noe  | 0.11 |
| 4283  | ENSG00000111224_at | PARP11  |             | mrna | 0.11 |
| 15671 | ENSG00000189068_at | VSTM1   |             | mrna | 0.11 |
| 19749 | ENSG00000257726_at |         |             | mrna | 0.11 |

Table 9: selected variables (inactive control, combined data set)

|       | Name               | HGNC     | Selection freq. |
|-------|--------------------|----------|-----------------|
| 18301 | ENSG00000243024_at | RPS11P6  | 0.64            |
| 11041 | ENSG00000165669_at | FAM204A  | 0.62            |
| 4963  | ENSG00000121351_at | IAPP     | 0.57            |
| 2281  | ENSG00000100664_at | EIF5     | 0.53            |
| 4890  | ENSG00000120675_at | DNAJC15  | 0.41            |
| 4468  | ENSG00000116885_at | OSCP1    | 0.34            |
| 9808  | ENSG00000159208_at | C1orf51  | 0.32            |
| 4729  | ENSG00000119487_at | MAPKAP1  | 0.22            |
| 5836  | ENSG00000128881_at | TTBK2    | 0.21            |
| 10720 | ENSG00000164291_at | ARSK     | 0.21            |
| 15870 | ENSG00000198590_at | C3orf35  | 0.19            |
| 681   | ENSG00000051620_at | HEBP2    | 0.18            |
| 5087  | ENSG00000122585_at | NPY      | 0.18            |
| 11196 | ENSG00000166323_at | C11orf65 | 0.17            |
| 99    | ENSG00000005471_at | ABCB4    | 0.15            |
| 6210  | ENSG00000131697_at | NPHP4    | 0.15            |
| 12388 | ENSG00000171786_at | NHLH1    | 0.14            |
| 15654 | ENSG00000197928_at | ZNF677   | 0.13            |
| 12061 | ENSG00000170255_at | MRGPRX1  | 0.11            |
| 15277 | ENSG00000196440_at | ARMCX4   | 0.11            |

Table 10: selected variables (inactive control, mrna data set)

|  | Name | Ppm | Selection freq. |
|--|------|-----|-----------------|
|--|------|-----|-----------------|

|     |                        |             |      |
|-----|------------------------|-------------|------|
| 112 |                        | 3.712430882 | 0.84 |
| 80  |                        | 2.828531781 | 0.82 |
| 6   |                        | 0.943470556 | 0.73 |
| 19  | alanine                | 1.463141868 | 0.71 |
| 61  | glutamine              | 2.448871784 | 0.65 |
| 116 |                        | 3.737919525 | 0.58 |
| 162 |                        | 4.477803679 | 0.52 |
| 47  |                        | 2.196867564 | 0.45 |
| 104 |                        | 3.347534709 | 0.36 |
| 59  | glutamine              | 2.423782982 | 0.35 |
| 203 |                        | 7.869591075 | 0.34 |
| 35  |                        | 2.0960042   | 0.3  |
| 26  | acetate                | 1.91089789  | 0.29 |
| 108 |                        | 3.688078694 | 0.28 |
| 179 |                        | 5.90484906  | 0.28 |
| 12  |                        | 0.998882741 | 0.27 |
| 134 | phosphorylethanolamine | 3.967780015 | 0.27 |
| 20  | alanine                | 1.478930983 | 0.23 |
| 150 |                        | 4.245506812 | 0.22 |
| 175 | glycogen               | 5.414940797 | 0.22 |
| 37  | glutamine              | 2.109300297 | 0.2  |
| 69  | glutathione            | 2.579566468 | 0.2  |
| 176 | glycogen               | 5.423161326 | 0.19 |
| 193 | tyrosine               | 6.895575388 | 0.19 |
| 77  | aspartate              | 2.78947264  | 0.18 |
| 15  | valine                 | 1.041413537 | 0.15 |
| 118 |                        | 3.750663847 | 0.15 |
| 38  | glutamine              | 2.115636719 | 0.13 |
| 114 |                        | 3.726480719 | 0.13 |
| 156 |                        | 4.353531113 | 0.13 |

Table 11: selected variables (inactive control, noe data set)

|     | Name | Ppm         | Selection freq. |
|-----|------|-------------|-----------------|
| 168 |      | 3.175844955 | 0.94            |
| 266 |      | 4.48200363  | 0.86            |
| 156 |      | 3.092754442 | 0.72            |
| 196 |      | 3.7126113   | 0.46            |
| 102 |      | 2.474182837 | 0.17            |
| 75  |      | 2.222863533 | 0.14            |

|    |         |             |      |
|----|---------|-------------|------|
| 23 | alanine | 1.463121505 | 0.13 |
| 79 |         | 2.269194746 | 0.12 |

Table 12: selected variables (inactive control, cpmg data set)

## 1.4 SiSd

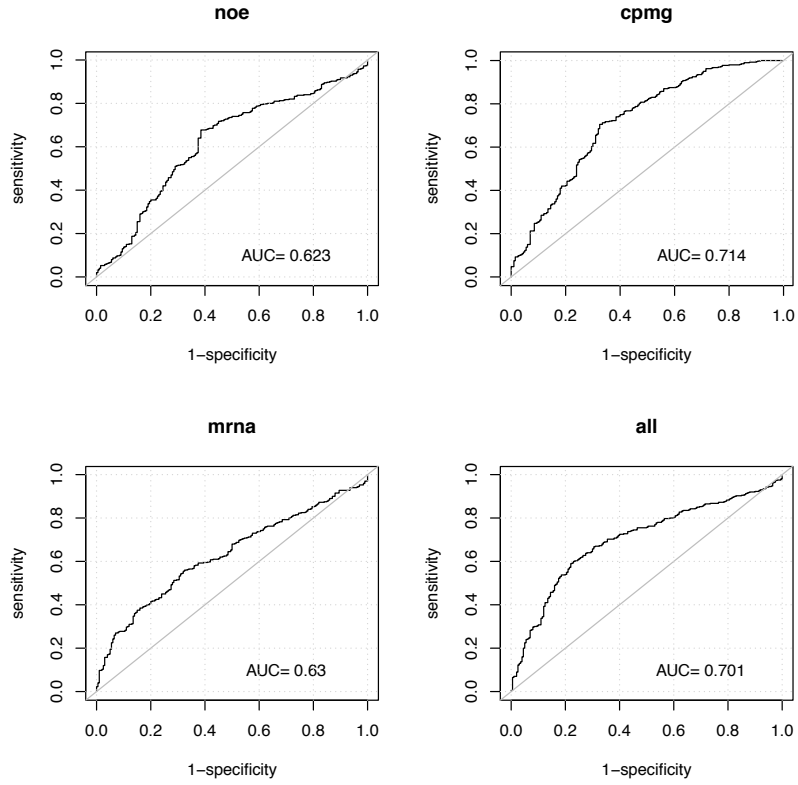

Figure 4: Prediction (logistic regression fitted by lasso) performance for “SiSd” analysis. ROC curves for each data set.

|       | Name               | HGNC   | Ppm         | Data set | Selection freq. |
|-------|--------------------|--------|-------------|----------|-----------------|
| 15124 | ENSG00000185565_at | LSAMP  | 3.315476883 | mrna     | 0.43            |
| 180   |                    |        |             | cpmg     | 0.39            |
| 9280  | ENSG00000148935_at | GAS2   |             | mrna     | 0.37            |
| 10339 | ENSG00000158874_at | APOA2  |             | mrna     | 0.24            |
| 3506  | ENSG00000105229_at | PIAS4  |             | mrna     | 0.23            |
| 1436  | ENSG00000064601_at | CTSA   |             | mrna     | 0.22            |
| 3468  | ENSG00000104964_at | AES    |             | mrna     | 0.2             |
| 5235  | ENSG00000118785_at | SPP1   |             | mrna     | 0.18            |
| 7925  | ENSG00000138617_at | PARP16 |             | mrna     | 0.16            |
| 81    |                    |        |             | cpmg     | 0.15            |
| 8845  | ENSG00000145284_at | SCD5   | 2.284443338 | mrna     | 0.14            |

|       |                    |          |             |      |      |
|-------|--------------------|----------|-------------|------|------|
| 15495 | ENSG00000188002_at |          |             | mrna | 0.13 |
| 15968 | ENSG00000196950_at | SLC39A10 |             | mrna | 0.12 |
| 276   |                    |          | 4.758837295 | cpmg | 0.11 |

Table 13: selected variables (SiSd, combined data set)

|       | Name               | HGNC    | Selection freq. |
|-------|--------------------|---------|-----------------|
| 14560 | ENSG00000185565_at | LSAMP   | 0.47            |
| 8716  | ENSG00000148935_at | GAS2    | 0.32            |
| 2942  | ENSG00000105229_at | PIAS4   | 0.26            |
| 4671  | ENSG00000118785_at | SPP1    | 0.25            |
| 2904  | ENSG00000104964_at | AES     | 0.2             |
| 872   | ENSG00000064601_at | CTSA    | 0.18            |
| 9775  | ENSG00000158874_at | APOA2   | 0.16            |
| 6902  | ENSG00000136098_at | NEK3    | 0.13            |
| 10586 | ENSG00000163909_at | HEYL    | 0.13            |
| 372   | ENSG00000017483_at | SLC38A5 | 0.11            |
| 12705 | ENSG00000173557_at | C2orf70 | 0.11            |

Table 14: selected variables (SiSd, mrna data set)

|     | Name        | Ppm         | Selection freq. |
|-----|-------------|-------------|-----------------|
| 106 |             | 3.592624177 | 0.64            |
| 48  | lipid       | 2.253171801 | 0.53            |
| 219 |             | 9.471835614 | 0.5             |
| 69  | glutathione | 2.579566468 | 0.3             |
| 196 |             | 7.209519457 | 0.3             |
| 97  | gpc         | 3.225218334 | 0.28            |
| 46  |             | 2.178066051 | 0.27            |
| 129 |             | 3.936503585 | 0.27            |
| 47  |             | 2.196867564 | 0.26            |
| 137 |             | 4.022206902 | 0.26            |
| 124 |             | 3.804976661 | 0.25            |
| 112 |             | 3.712430882 | 0.21            |
| 14  | valine      | 1.029642612 | 0.2             |
| 26  | acetate     | 1.91089789  | 0.16            |
| 57  |             | 2.373326067 | 0.16            |
| 192 | tyrosine    | 6.874034118 | 0.15            |
| 21  | lipid       | 1.589194955 | 0.14            |
| 44  | glutamine   | 2.154278502 | 0.14            |



|     |              |             |      |
|-----|--------------|-------------|------|
| 45  |              | 2.165289332 | 0.14 |
| 60  | glutamine    | 2.436397544 | 0.14 |
| 140 | myo-inositol | 4.053887421 | 0.14 |
| 162 |              | 4.477803679 | 0.14 |
| 170 | glucose      | 5.212423383 | 0.14 |
| 123 |              | 3.799400243 | 0.13 |
| 104 |              | 3.347534709 | 0.11 |

Table 15: selected variables (SiSd, noe data set)

|     | Name         | Ppm         | Selection freq. |
|-----|--------------|-------------|-----------------|
| 81  |              | 2.284443338 | 0.86            |
| 276 |              | 4.758837295 | 0.73            |
| 180 |              | 3.315476883 | 0.51            |
| 345 |              | 9.475774448 | 0.48            |
| 104 |              | 2.508036326 | 0.35            |
| 323 |              | 7.433508139 | 0.34            |
| 260 |              | 4.35270246  | 0.32            |
| 184 |              | 3.346628064 | 0.31            |
| 179 |              | 3.296905    | 0.27            |
| 242 | lactate      | 4.111888776 | 0.27            |
| 92  |              | 2.384329941 | 0.25            |
| 49  |              | 1.983786542 | 0.24            |
| 255 |              | 4.28480121  | 0.19            |
| 280 | glucose      | 5.212160888 | 0.19            |
| 314 |              | 7.210899163 | 0.19            |
| 227 |              | 3.996872536 | 0.18            |
| 158 |              | 3.105224973 | 0.17            |
| 48  |              | 1.97267515  | 0.14            |
| 73  |              | 2.194471652 | 0.14            |
| 190 |              | 3.612459587 | 0.14            |
| 234 | myo-inositol | 4.039315523 | 0.14            |
| 137 |              | 2.89984999  | 0.13            |
| 327 |              | 7.872866325 | 0.11            |

Table 16: selected variables (SiSd, cpmg data set)

## 1.5 Duration

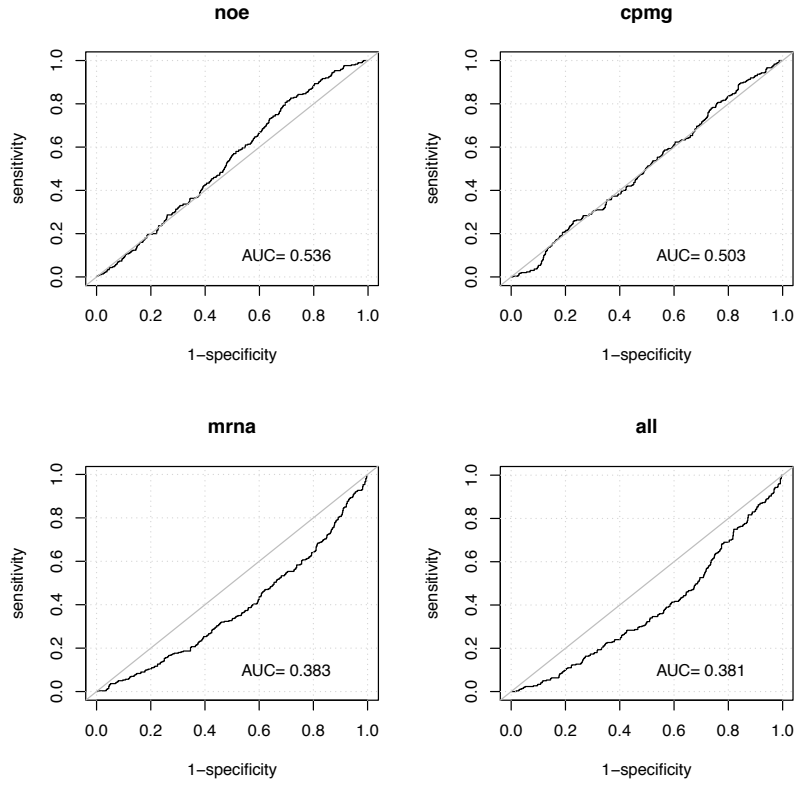

Figure 5: Prediction (logistic regression fitted by lasso) performance for “Duration” analysis. ROC curves for each data set.

|       | Name               | HGNC  | Ppm | Data set | Selection freq. |
|-------|--------------------|-------|-----|----------|-----------------|
| 1894  | ENSG00000077092_at | RARB  |     | mrna     | 0.18            |
| 18953 | ENSG00000245025_at |       |     | mrna     | 0.16            |
| 1374  | ENSG00000061337_at | LZTS1 |     | mrna     | 0.11            |

Table 17: selected variables (Duration, combined data set)

|       | Name               | HGNC  | Selection freq. |
|-------|--------------------|-------|-----------------|
| 1330  | ENSG00000077092_at | RARB  | 0.32            |
| 17923 | ENSG00000235728_at |       | 0.12            |
| 14704 | ENSG00000186340_at | THBS2 | 0.11            |

Table 18: selected variables (Duration, mrna data set)

|     | Name            | Ppm         | Selection freq. |
|-----|-----------------|-------------|-----------------|
| 108 |                 | 3.688078694 | 0.61            |
| 104 |                 | 3.347534709 | 0.57            |
| 10  | valine          | 0.976784495 | 0.54            |
| 123 |                 | 3.799400243 | 0.5             |
| 168 | glucose         | 4.629347879 | 0.47            |
| 135 |                 | 4.005477649 | 0.45            |
| 80  |                 | 2.828531781 | 0.44            |
| 114 |                 | 3.726480719 | 0.43            |
| 96  | pc              | 3.214817528 | 0.41            |
| 45  |                 | 2.165289332 | 0.39            |
| 97  | gpc             | 3.225218334 | 0.3             |
| 26  | acetate         | 1.91089789  | 0.29            |
| 98  |                 | 3.239711261 | 0.29            |
| 124 |                 | 3.804976661 | 0.29            |
| 122 |                 | 3.782266901 | 0.28            |
| 146 |                 | 4.16221968  | 0.28            |
| 162 |                 | 4.477803679 | 0.27            |
| 90  | creatine        | 3.024960251 | 0.25            |
| 129 |                 | 3.936503585 | 0.24            |
| 103 | scyllo-inositol | 3.335121944 | 0.22            |
| 212 |                 | 8.344651987 | 0.22            |
| 173 | glycogen        | 5.403066701 | 0.19            |
| 5   |                 | 0.932254863 | 0.18            |
| 85  | asparagine      | 2.956200282 | 0.17            |
| 113 |                 | 3.719207131 | 0.17            |
| 154 |                 | 4.336956988 | 0.17            |
| 81  |                 | 2.907385432 | 0.16            |
| 210 |                 | 8.223479012 | 0.15            |
| 83  | asparagine      | 2.932435158 | 0.14            |
| 112 |                 | 3.712430882 | 0.13            |
| 46  |                 | 2.178066051 | 0.12            |
| 73  |                 | 2.657284529 | 0.12            |
| 120 |                 | 3.762413489 | 0.12            |
| 1   | lipid           | 0.88249657  | 0.11            |
| 59  | glutamine       | 2.423782982 | 0.11            |
| 148 |                 | 4.22639782  | 0.11            |

|     |          |             |      |
|-----|----------|-------------|------|
| 175 | glycogen | 5.414940797 | 0.11 |
|-----|----------|-------------|------|

Table 19: selected variables (Duration, noe data set)

|     | Name            | Ppm         | Selection freq. |
|-----|-----------------|-------------|-----------------|
| 277 |                 | 4.767992875 | 0.75            |
| 48  |                 | 1.97267515  | 0.65            |
| 310 | tyrosine        | 6.874495023 | 0.36            |
| 199 |                 | 3.727119949 | 0.35            |
| 156 |                 | 3.092754442 | 0.34            |
| 309 | fumarate        | 6.509836489 | 0.31            |
| 191 |                 | 3.68024848  | 0.29            |
| 266 |                 | 4.48200363  | 0.28            |
| 10  | valine          | 0.976657294 | 0.27            |
| 212 |                 | 3.792718617 | 0.26            |
| 257 |                 | 4.332907817 | 0.23            |
| 172 | pc              | 3.215948458 | 0.2             |
| 192 |                 | 3.689158497 | 0.18            |
| 183 | scyllo-inositol | 3.334861322 | 0.17            |
| 274 |                 | 4.652478622 | 0.17            |
| 202 |                 | 3.742516185 | 0.16            |
| 333 |                 | 8.026599627 | 0.15            |
| 179 |                 | 3.296905    | 0.14            |
| 288 |                 | 5.784504915 | 0.14            |
| 17  |                 | 1.062044033 | 0.13            |
| 231 |                 | 4.013974573 | 0.13            |
| 298 |                 | 5.963174077 | 0.13            |
| 180 |                 | 3.315476883 | 0.12            |
| 111 | glutathione     | 2.567515644 | 0.11            |
| 167 |                 | 3.170412542 | 0.11            |
| 211 |                 | 3.787352757 | 0.11            |

Table 20: selected variables (Duration, cpmg data set)

## 1.6 DebutLess25

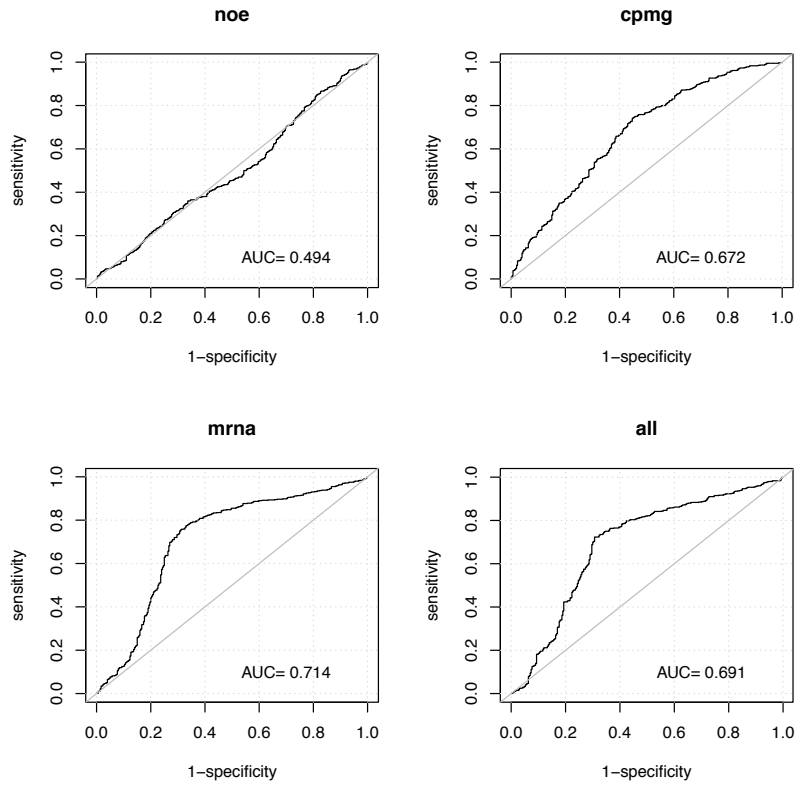

Figure 6: Prediction (logistic regression fitted by lasso) performance for “DebutLess25” analysis. ROC curves for each data set.

|       | Name               | HGNC    | Ppm         | Data set | Selection freq. |
|-------|--------------------|---------|-------------|----------|-----------------|
| 15201 | ENSG00000185942_at | NKAIN3  | 7.362883464 | mrna     | 0.96            |
| 17900 | ENSG00000229196_at |         |             | mrna     | 0.37            |
| 16956 | ENSG00000206177_at | HBM     |             | mrna     | 0.25            |
| 12615 | ENSG00000170178_at | HOXD12  |             | mrna     | 0.19            |
| 319   |                    |         |             | cpmg     | 0.15            |
| 1771  | ENSG00000073754_at | CD5L    |             | mrna     | 0.15            |
| 4937  | ENSG00000116151_at | MORN1   |             | mrna     | 0.14            |
| 5564  | ENSG00000121764_at | HCRTR1  |             | mrna     | 0.13            |
| 6368  | ENSG00000128596_at | CCDC136 |             | mrna     | 0.11            |
| 8424  | ENSG00000142233_at | NTN5    |             | mrna     | 0.11            |

Table 21: selected variables (DebutLess25, combined data set)

|       | Name               | HGNC   | Selection freq. |
|-------|--------------------|--------|-----------------|
| 14637 | ENSG00000185942_at | NKAIN3 | 0.98            |
| 17336 | ENSG00000229196_at |        | 0.28            |
| 16392 | ENSG00000206177_at | HBM    | 0.21            |
| 1207  | ENSG00000073754_at | CD5L   | 0.19            |
| 7860  | ENSG00000142233_at | NTN5   | 0.17            |
| 5000  | ENSG00000121764_at | HCRTR1 | 0.16            |
| 19330 | ENSG00000259650_at |        | 0.14            |
| 9065  | ENSG00000152348_at | ATG10  | 0.13            |
| 12051 | ENSG00000170178_at | HOXD12 | 0.13            |
| 9293  | ENSG00000154478_at | GPR26  | 0.12            |

Table 22: selected variables (DebutLess25, mrna data set)

|     | Name            | Ppm         | Selection freq. |
|-----|-----------------|-------------|-----------------|
| 130 |                 | 3.942403273 | 0.67            |
| 47  |                 | 2.196867564 | 0.41            |
| 209 |                 | 8.214158014 | 0.34            |
| 103 | scyllo-inositol | 3.335121944 | 0.33            |
| 85  | asparagine      | 2.956200282 | 0.32            |
| 115 |                 | 3.732386624 | 0.32            |
| 136 |                 | 4.012266332 | 0.32            |
| 174 | glycogen        | 5.409612677 | 0.32            |
| 18  | lactate         | 1.332269992 | 0.3             |
| 48  | lipid           | 2.253171801 | 0.26            |
| 93  |                 | 3.185916927 | 0.26            |
| 214 |                 | 8.599450426 | 0.26            |
| 169 | glucose         | 4.64544428  | 0.24            |
| 194 | tyrosine        | 7.168431479 | 0.21            |
| 49  |                 | 2.299844441 | 0.2             |
| 144 |                 | 4.124154567 | 0.2             |
| 140 | myo-inositol    | 4.053887421 | 0.19            |
| 75  |                 | 2.687719603 | 0.18            |
| 50  |                 | 2.313179481 | 0.17            |
| 129 |                 | 3.936503585 | 0.16            |
| 211 |                 | 8.253616906 | 0.16            |

|     |             |             |      |
|-----|-------------|-------------|------|
| 99  |             | 3.246531461 | 0.15 |
| 94  | choline     | 3.197767026 | 0.12 |
| 95  |             | 3.206803792 | 0.12 |
| 64  | glutathione | 2.541030977 | 0.11 |
| 70  |             | 2.618800798 | 0.11 |
| 145 |             | 4.134580044 | 0.11 |

Table 23: selected variables (DebutLess25, noe data set)

|     | Name        | Ppm         | Selection freq. |
|-----|-------------|-------------|-----------------|
| 252 |             | 4.26315663  | 0.83            |
| 262 |             | 4.409154783 | 0.8             |
| 276 |             | 4.758837295 | 0.63            |
| 319 |             | 7.362883464 | 0.61            |
| 274 |             | 4.652478622 | 0.58            |
| 169 |             | 3.188072049 | 0.54            |
| 315 |             | 7.257793947 | 0.4             |
| 22  | lactate     | 1.332504019 | 0.35            |
| 40  |             | 1.742570797 | 0.33            |
| 4   | isoleucine  | 0.92261137  | 0.3             |
| 105 |             | 2.521715744 | 0.27            |
| 200 |             | 3.732820994 | 0.26            |
| 136 |             | 2.892594136 | 0.24            |
| 257 |             | 4.332907817 | 0.23            |
| 198 |             | 3.721555455 | 0.22            |
| 279 |             | 5.169145106 | 0.2             |
| 335 |             | 8.202448906 | 0.18            |
| 114 |             | 2.618684459 | 0.15            |
| 209 |             | 3.776751919 | 0.15            |
| 230 |             | 4.009875576 | 0.15            |
| 159 |             | 3.112153115 | 0.12            |
| 231 |             | 4.013974573 | 0.12            |
| 255 |             | 4.28480121  | 0.12            |
| 108 | glutathione | 2.547507381 | 0.11            |
| 184 |             | 3.346628064 | 0.11            |
| 296 |             | 5.935568788 | 0.11            |

Table 24: selected variables (DebutLess25, cpmg data set)

## 2 Prediction results (OPLS-DA)



## 2.1 ActiveControl

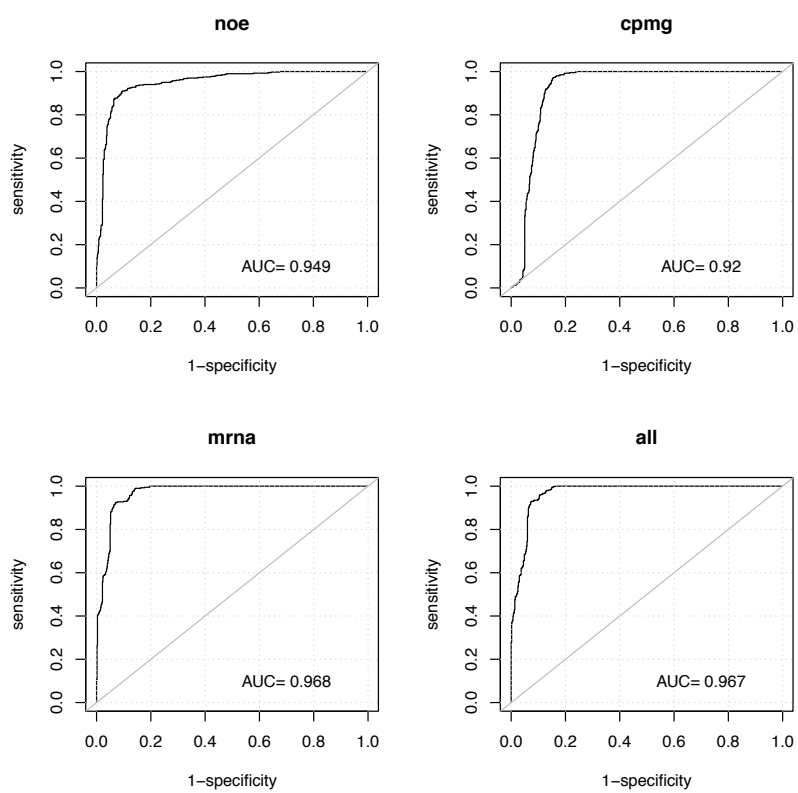

Figure 7: Prediction (OPLS) performance for “activeControl” analysis. ROC curves for each data set.

## 2.2 InactiveActive

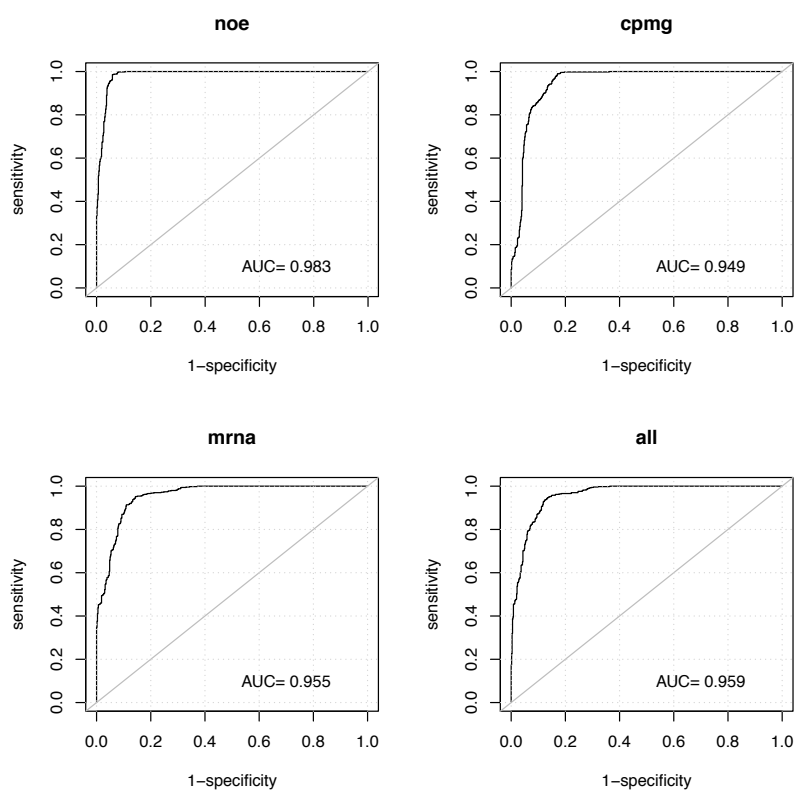

Figure 8: Prediction (OPLS) performance for “InactiveActive” analysis. ROC curves for each data set.

## 2.3 InactiveControl

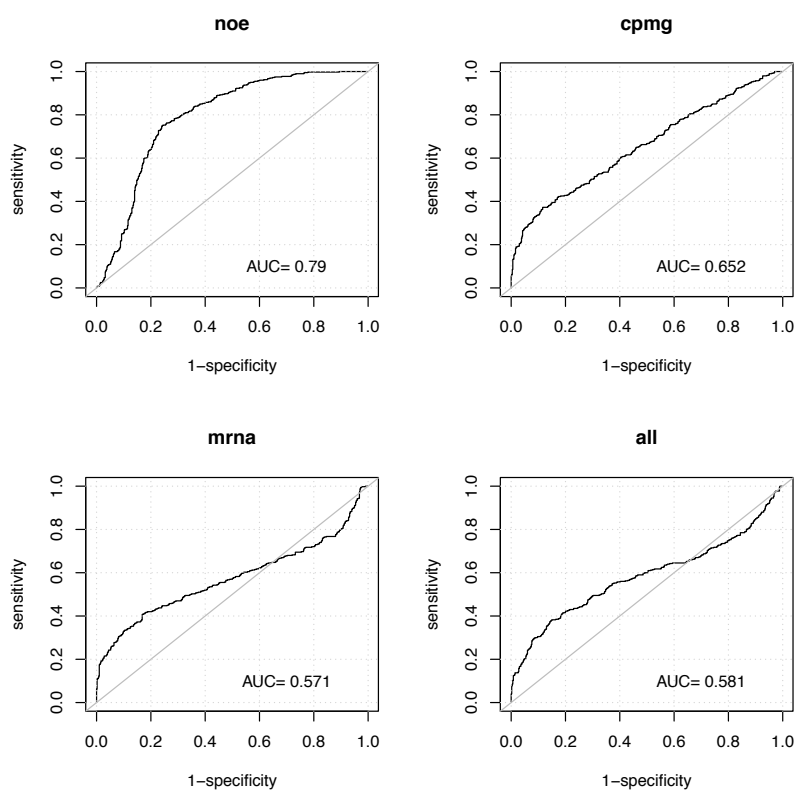

Figure 9: Prediction (OPLS) performance for “InactiveControl” analysis. ROC curves for each data set.

## 2.4 SiSd

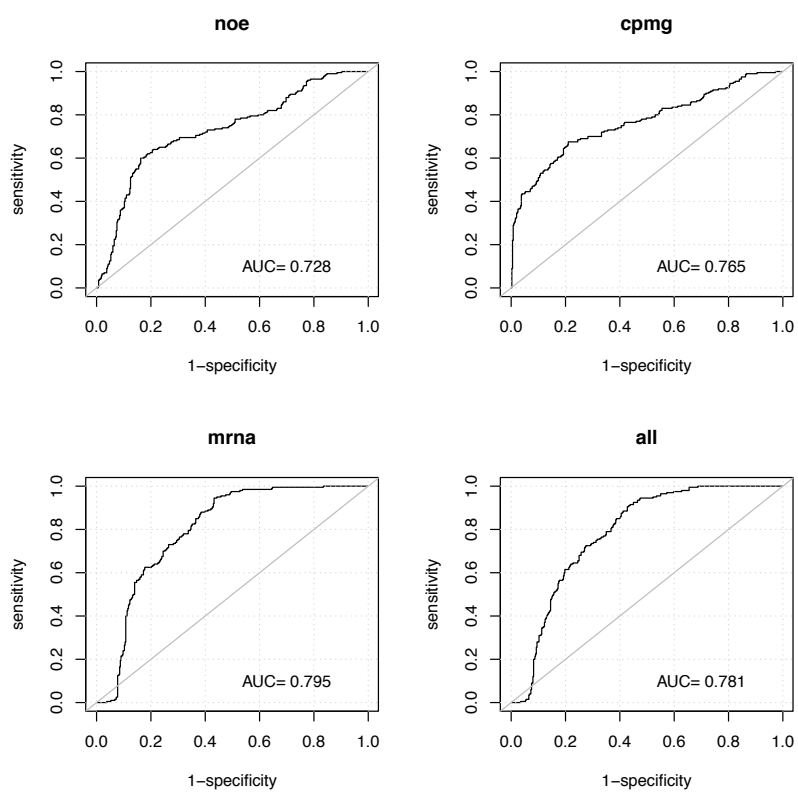

Figure 10: Prediction (OPLS) performance for “SiSd” analysis. ROC curves for each data set.

## 2.5 DebutLess25

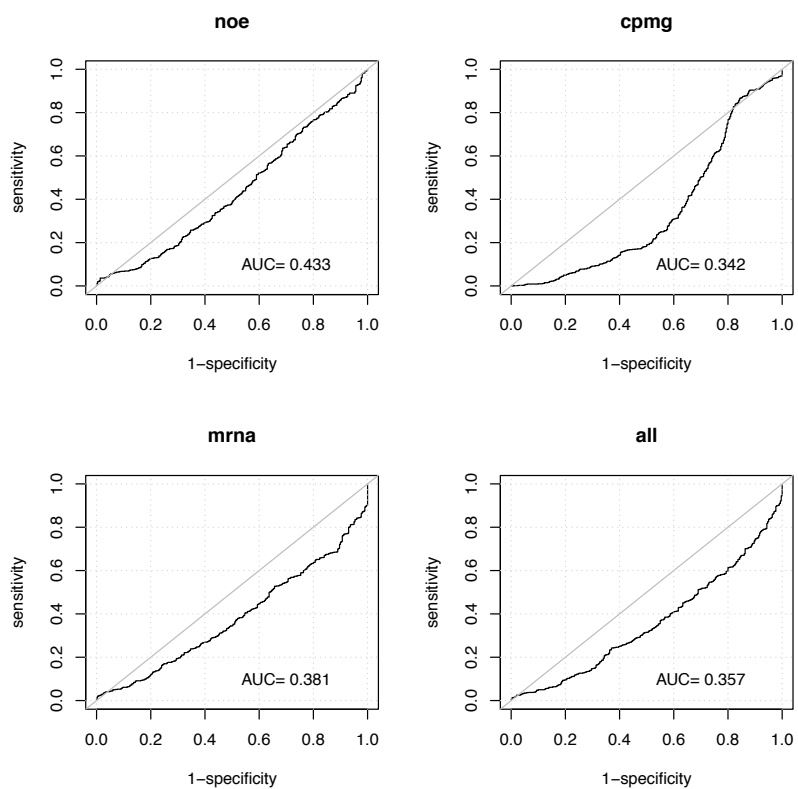

Figure 11: Prediction (OPLS) performance for “DebutLess25” analysis. ROC curves for each data set.

## 2.6 Duration

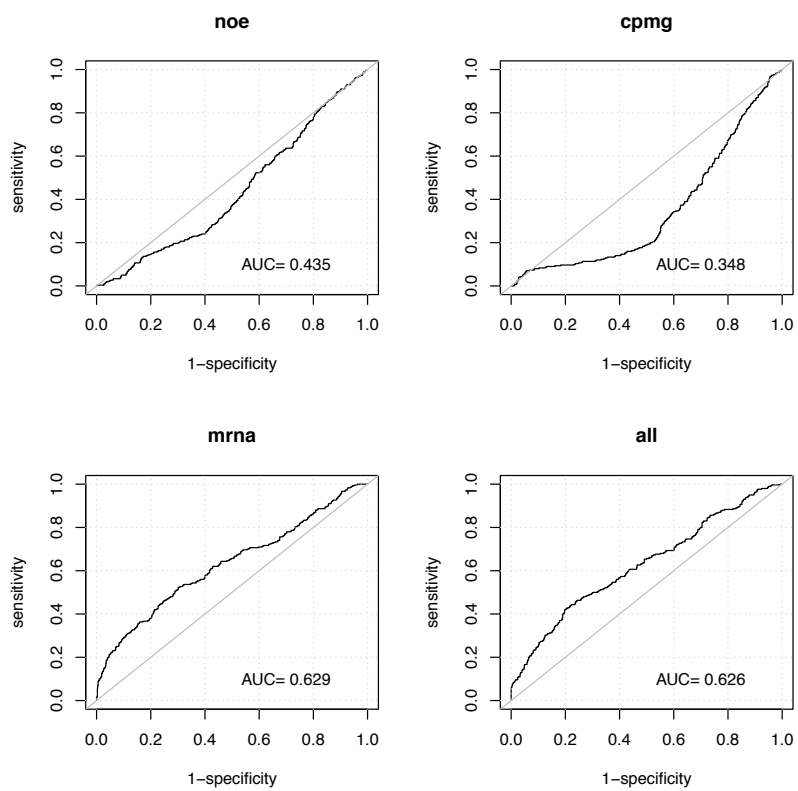

Figure 12: Prediction (OPLS) performance for “Duration” analysis. ROC curves for each data set.
