# Supplementary material
Source: PubMed Central journal article supplement (PMC4161940)

# NMR spectra with selected peaks/spectral features

April 18, 2013

## NOE SPECTRA

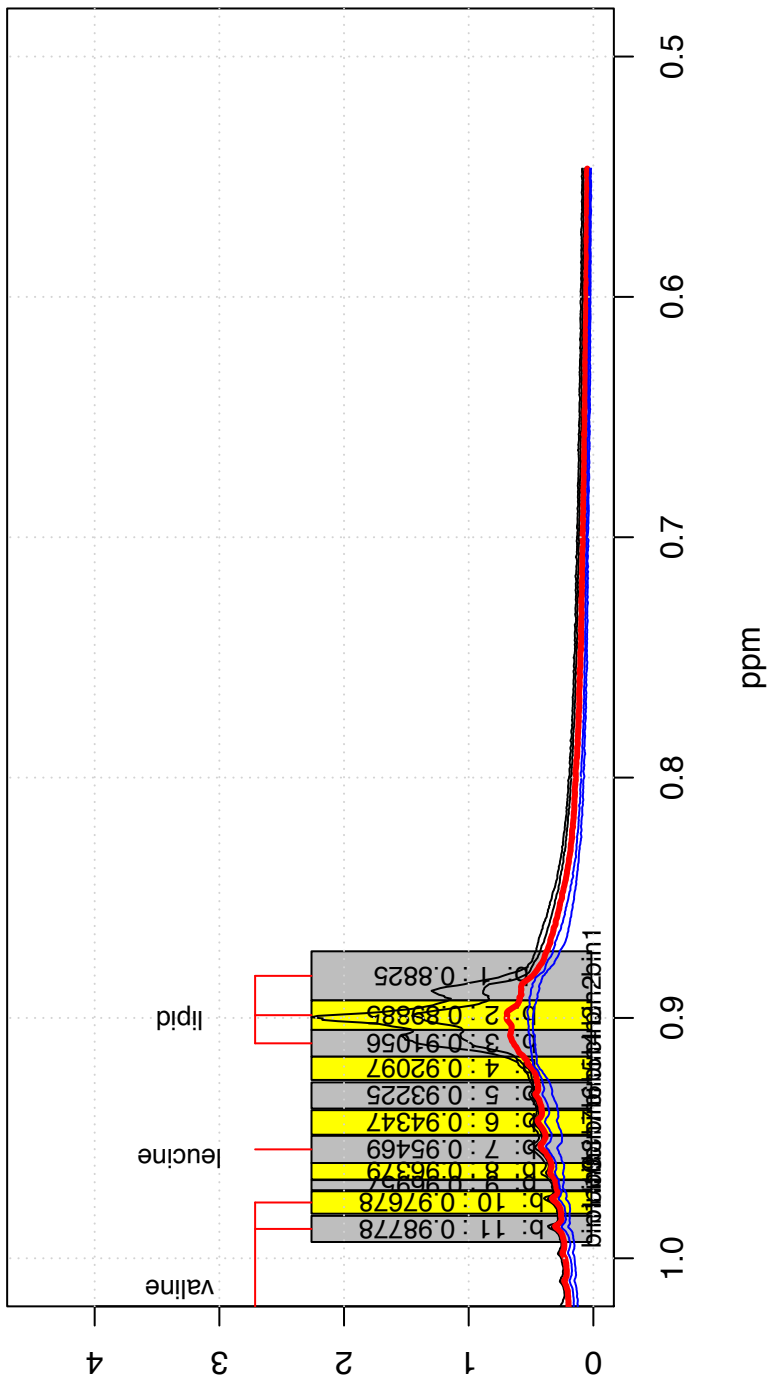

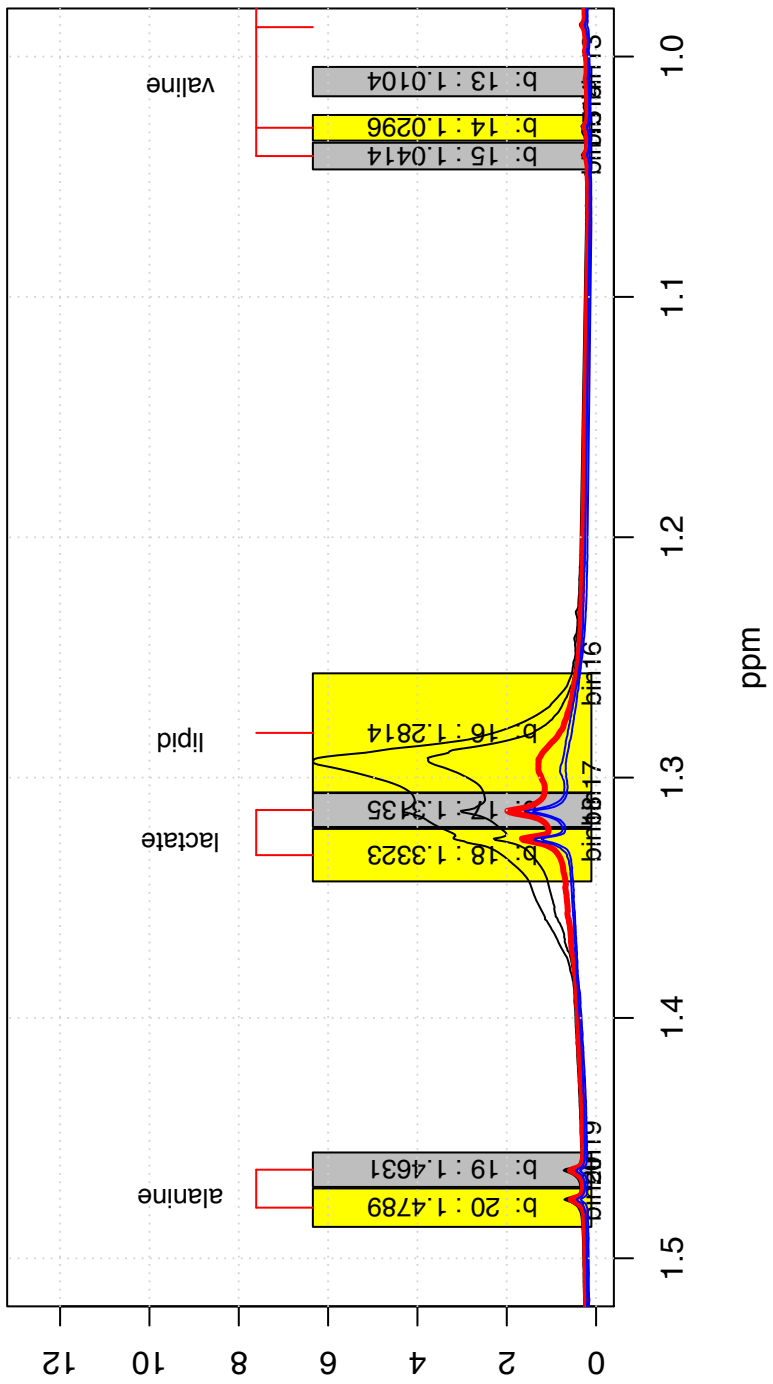

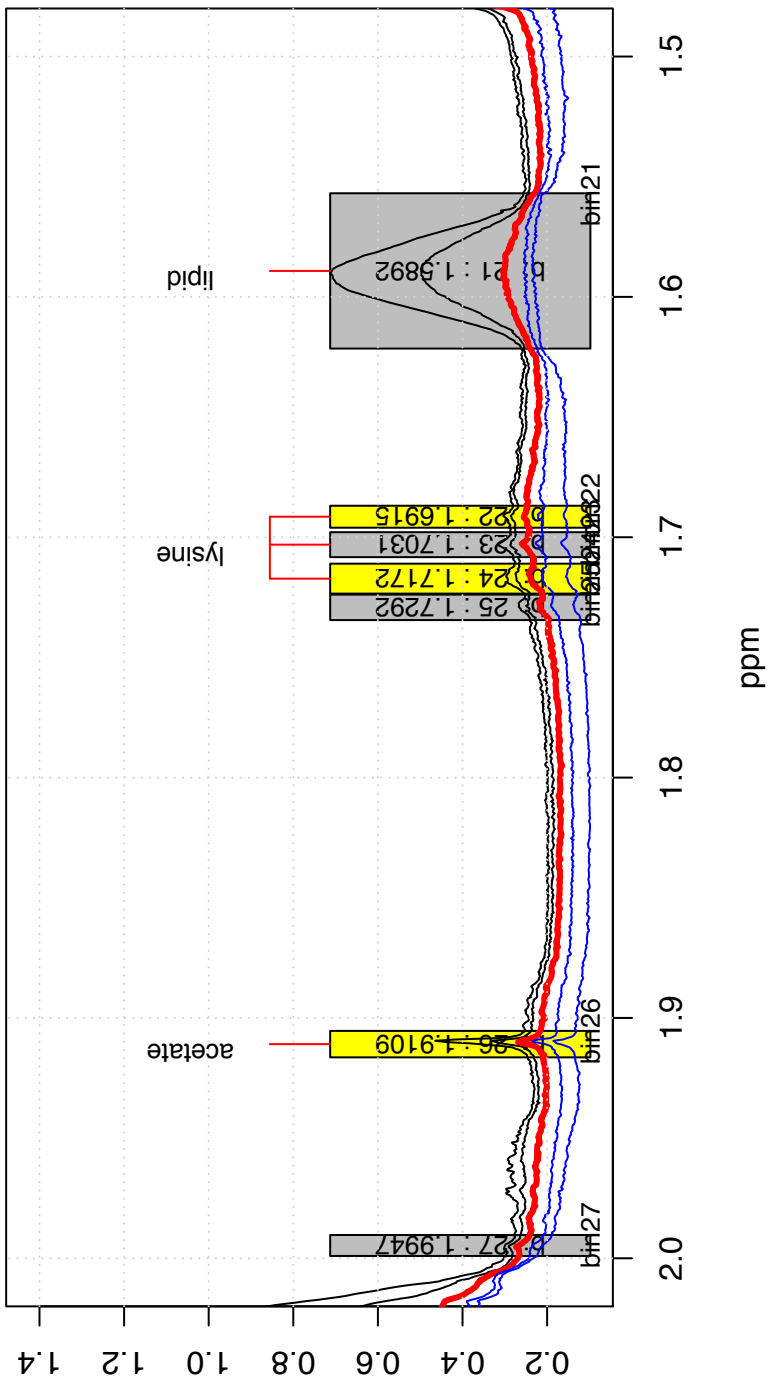

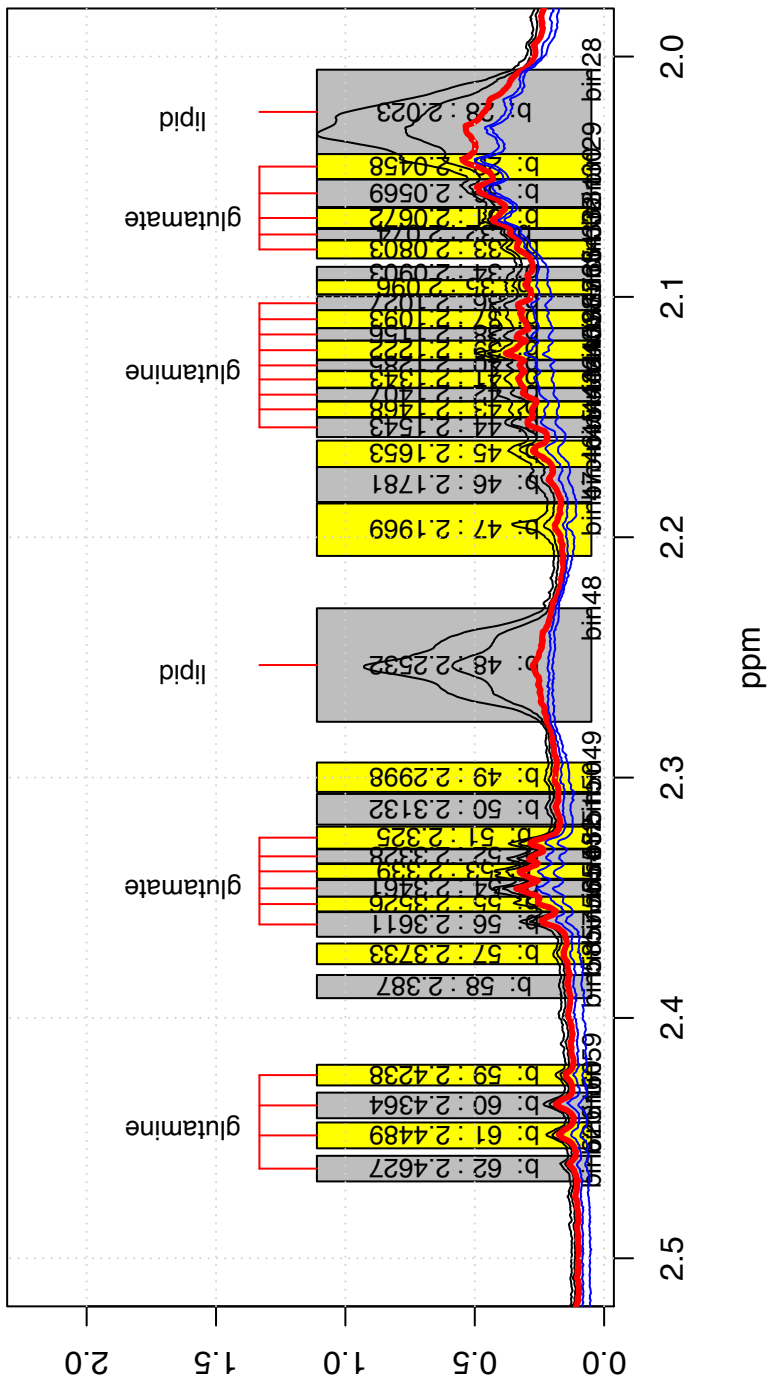



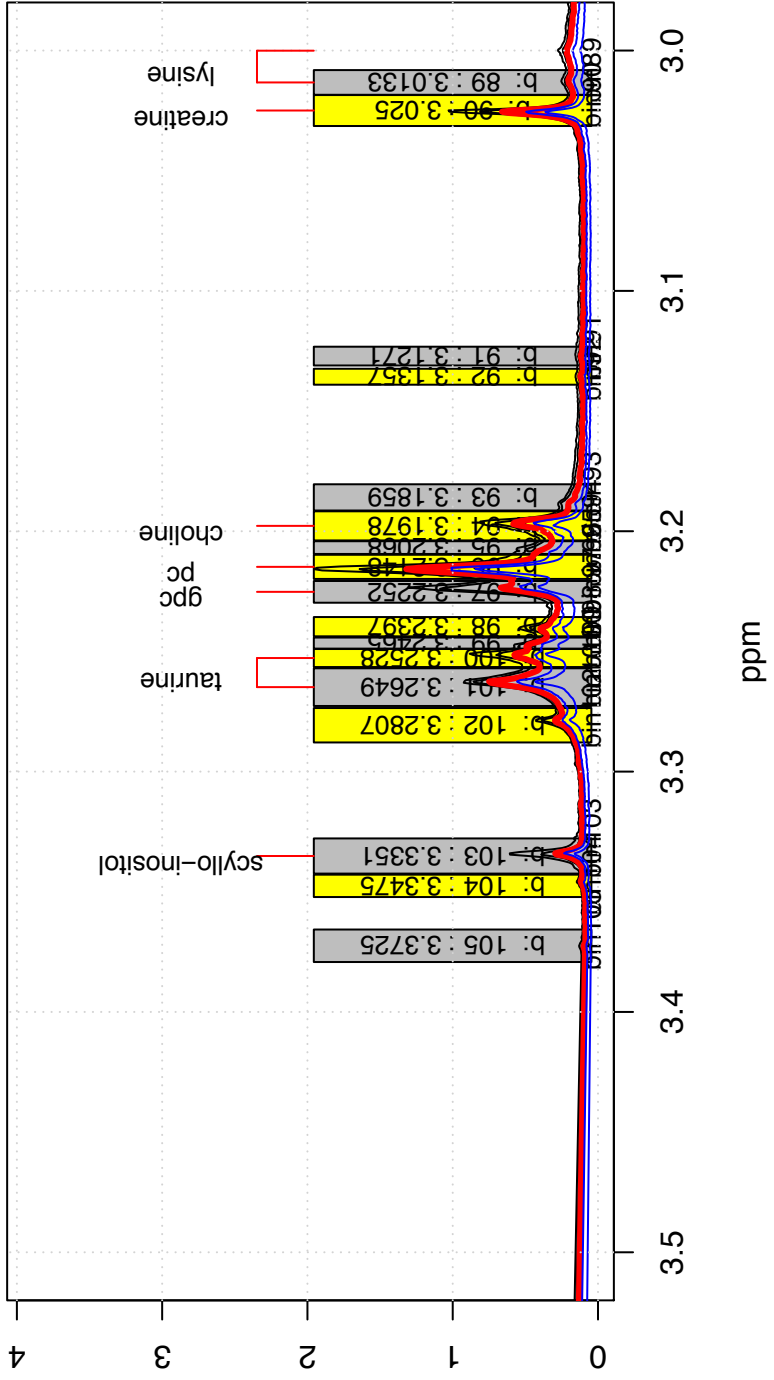





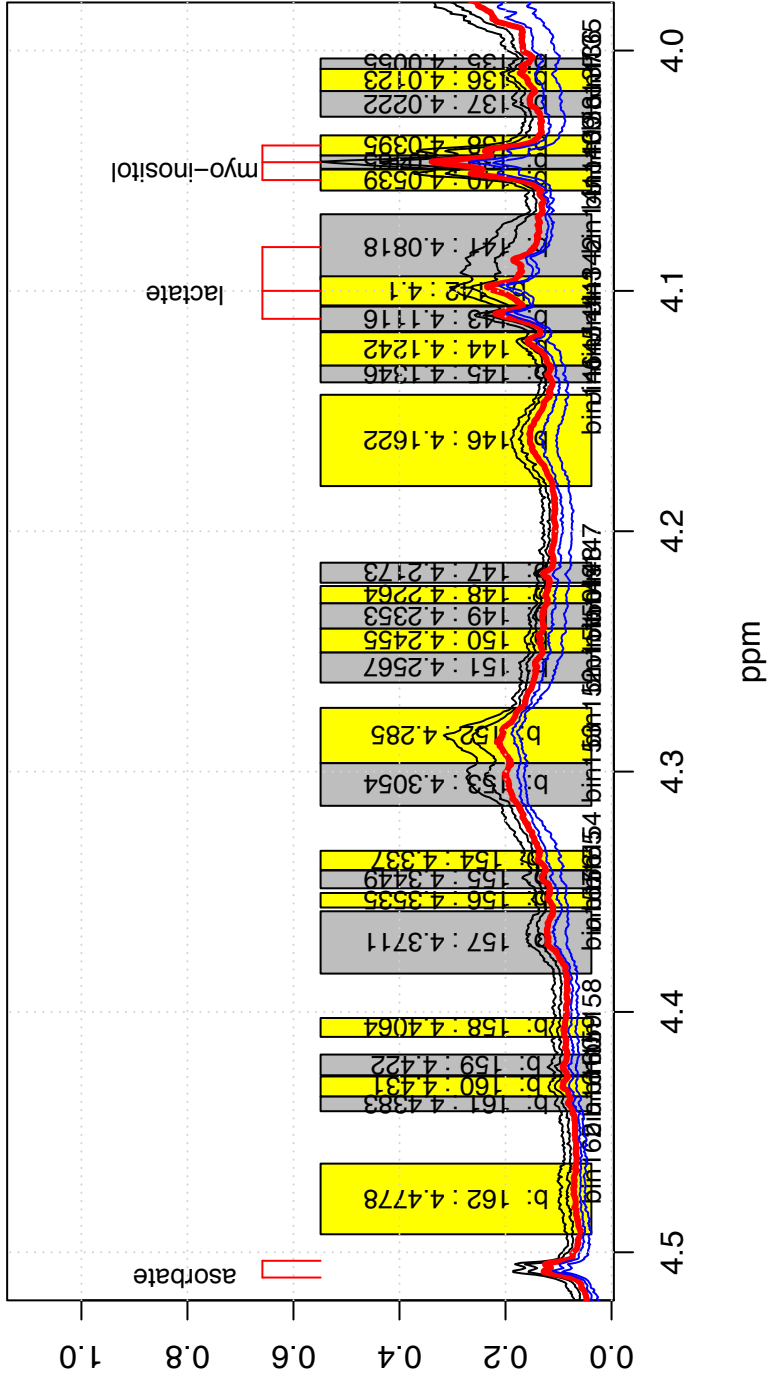

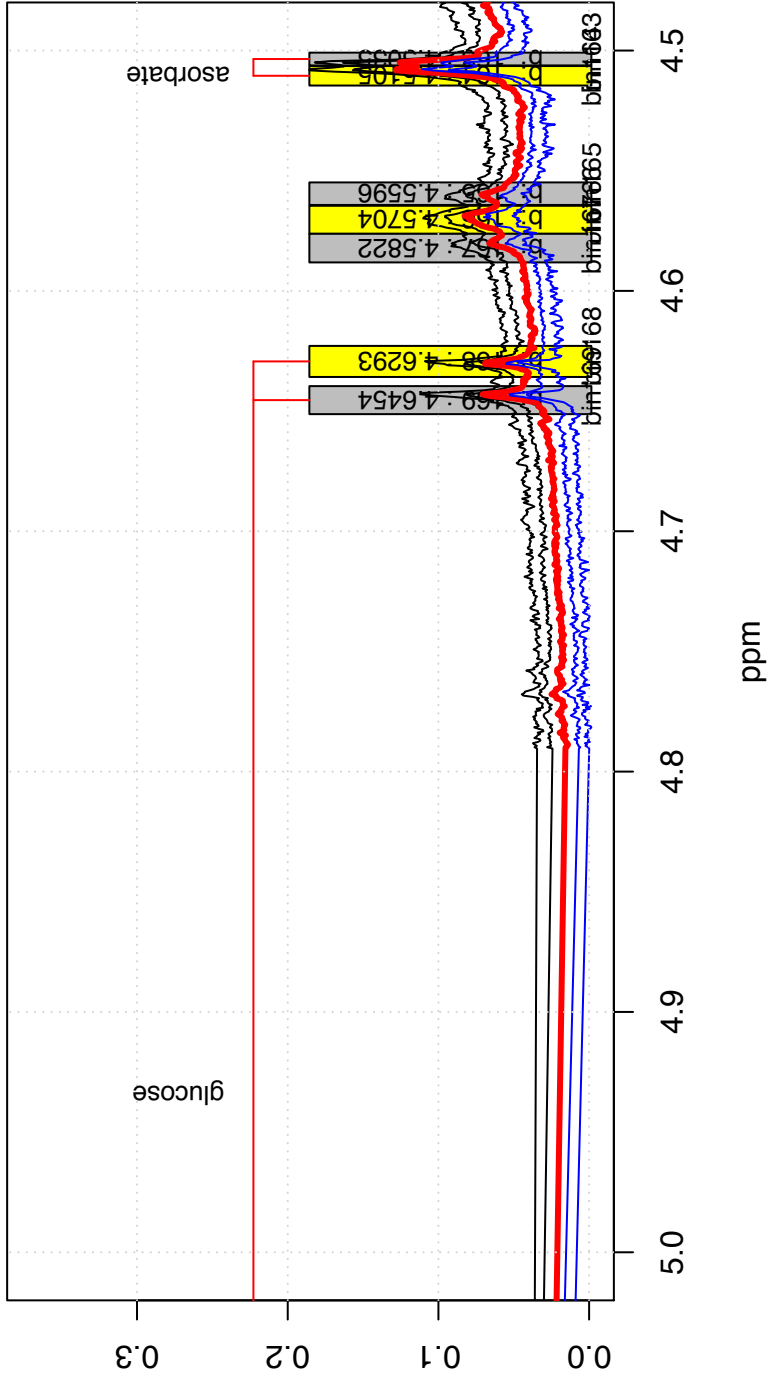

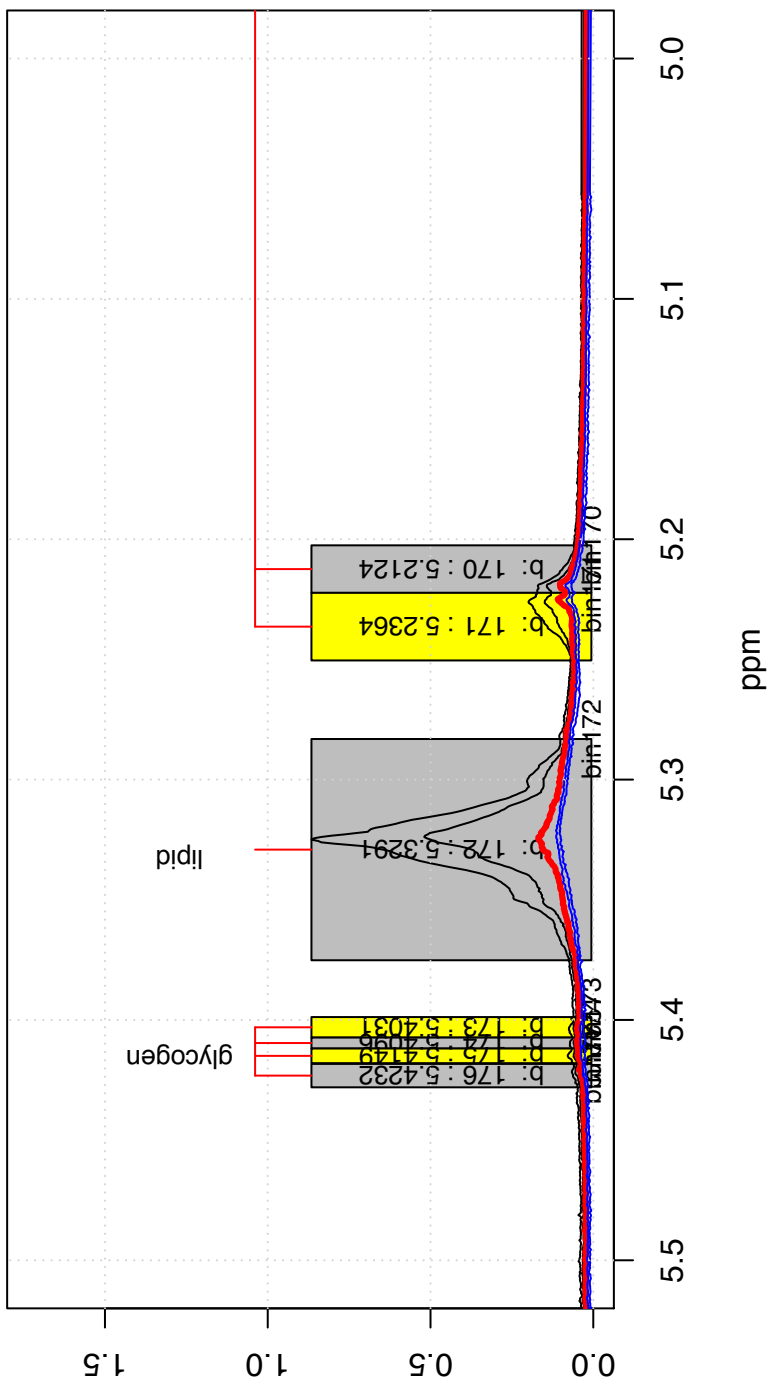

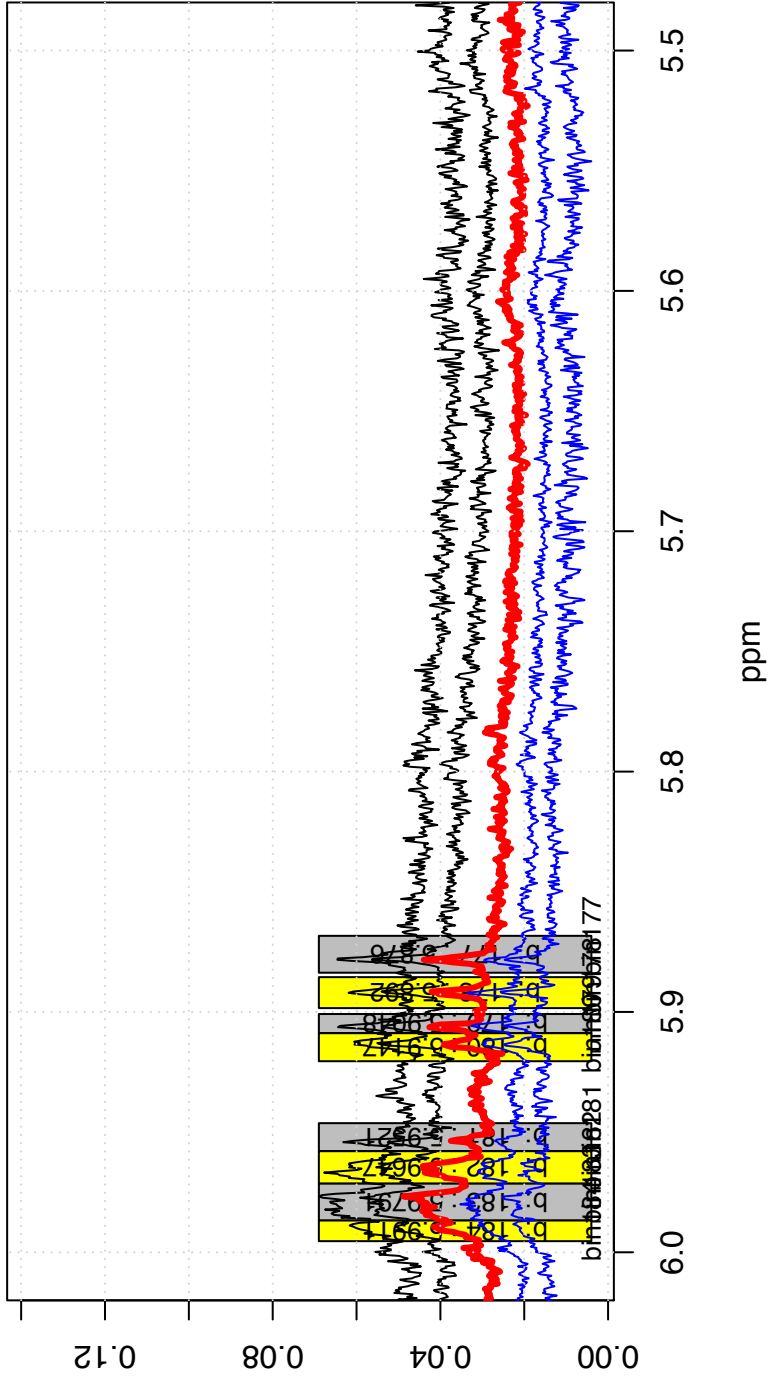

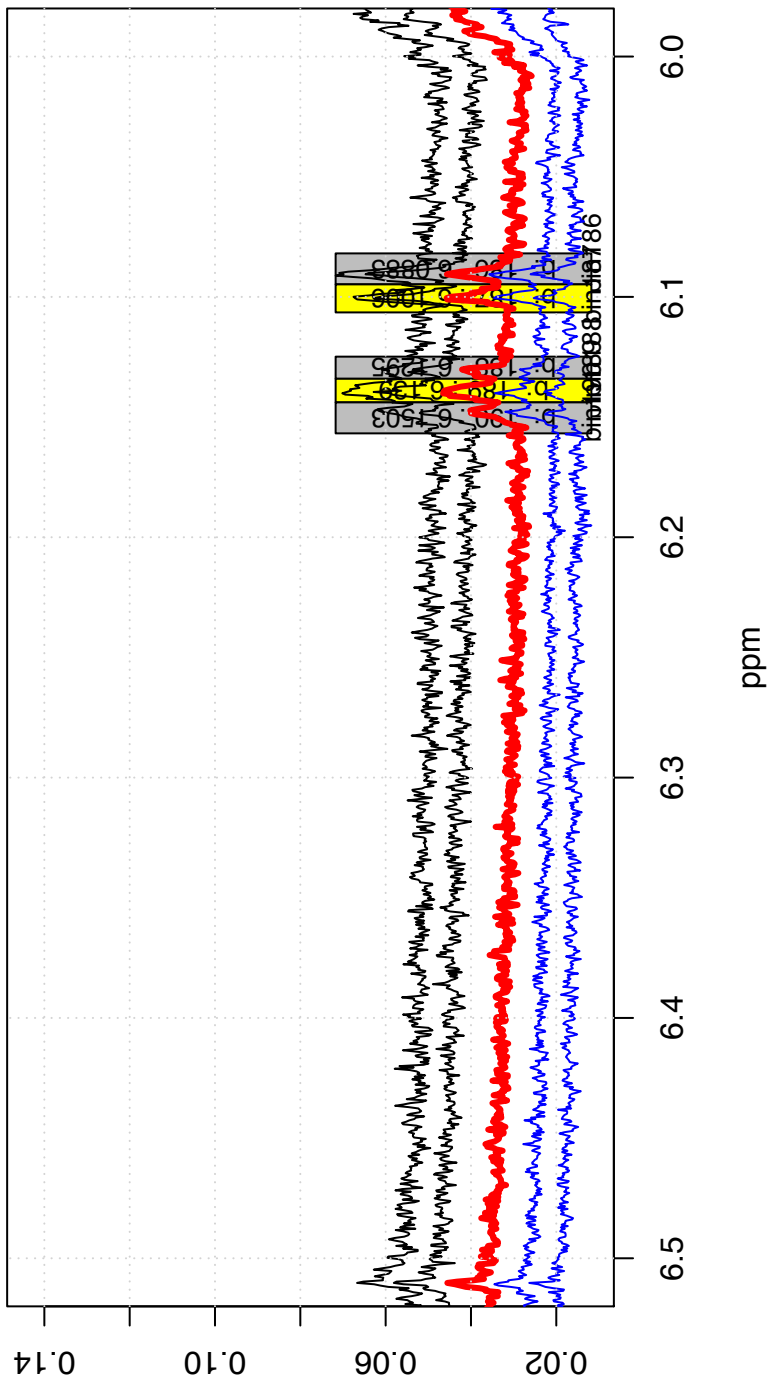

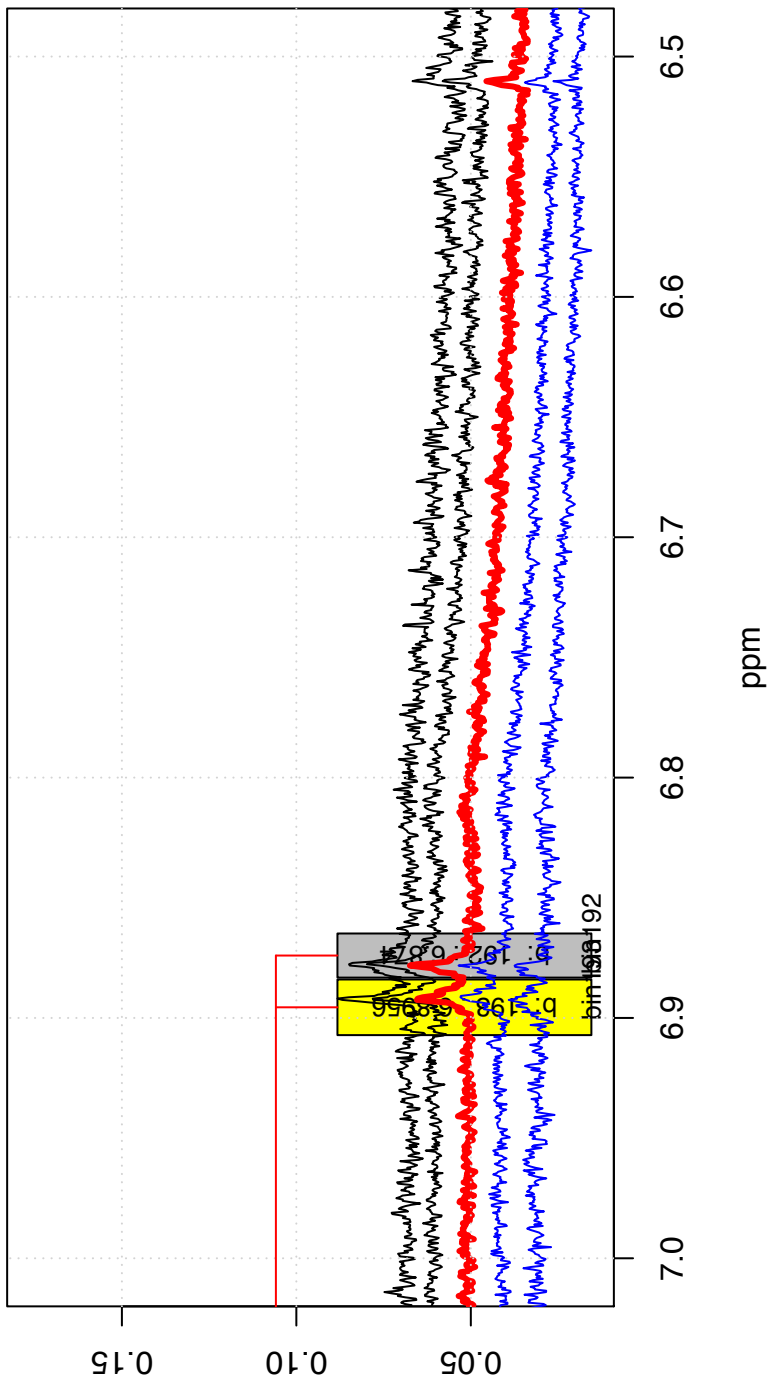

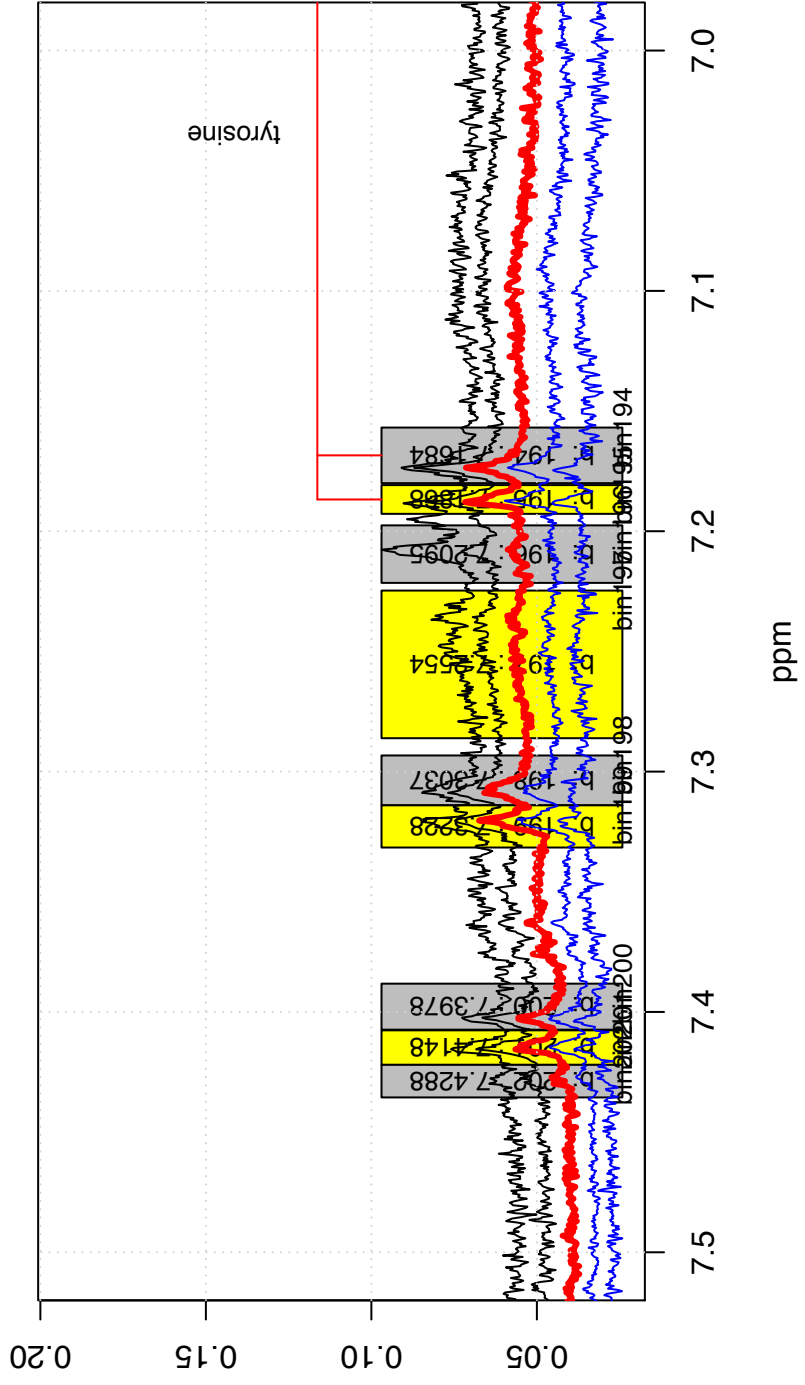



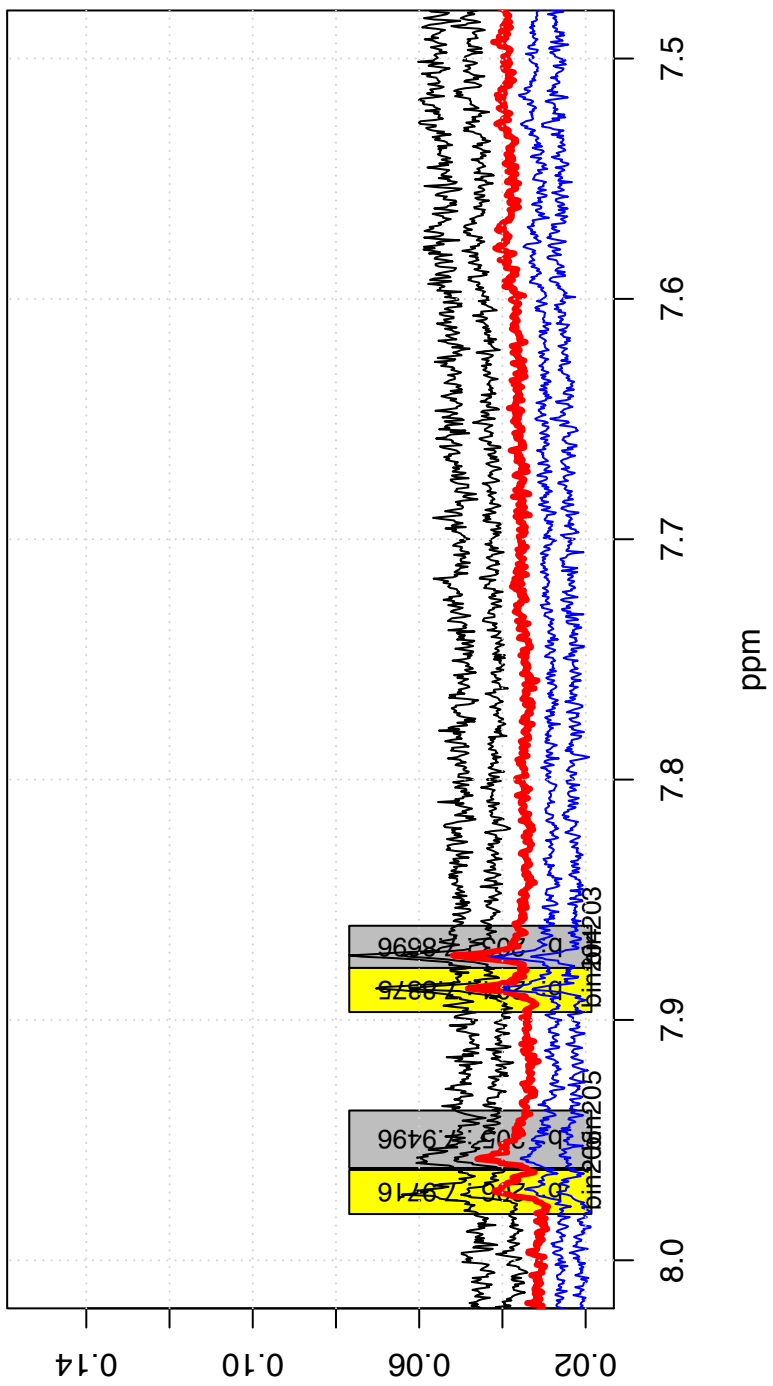

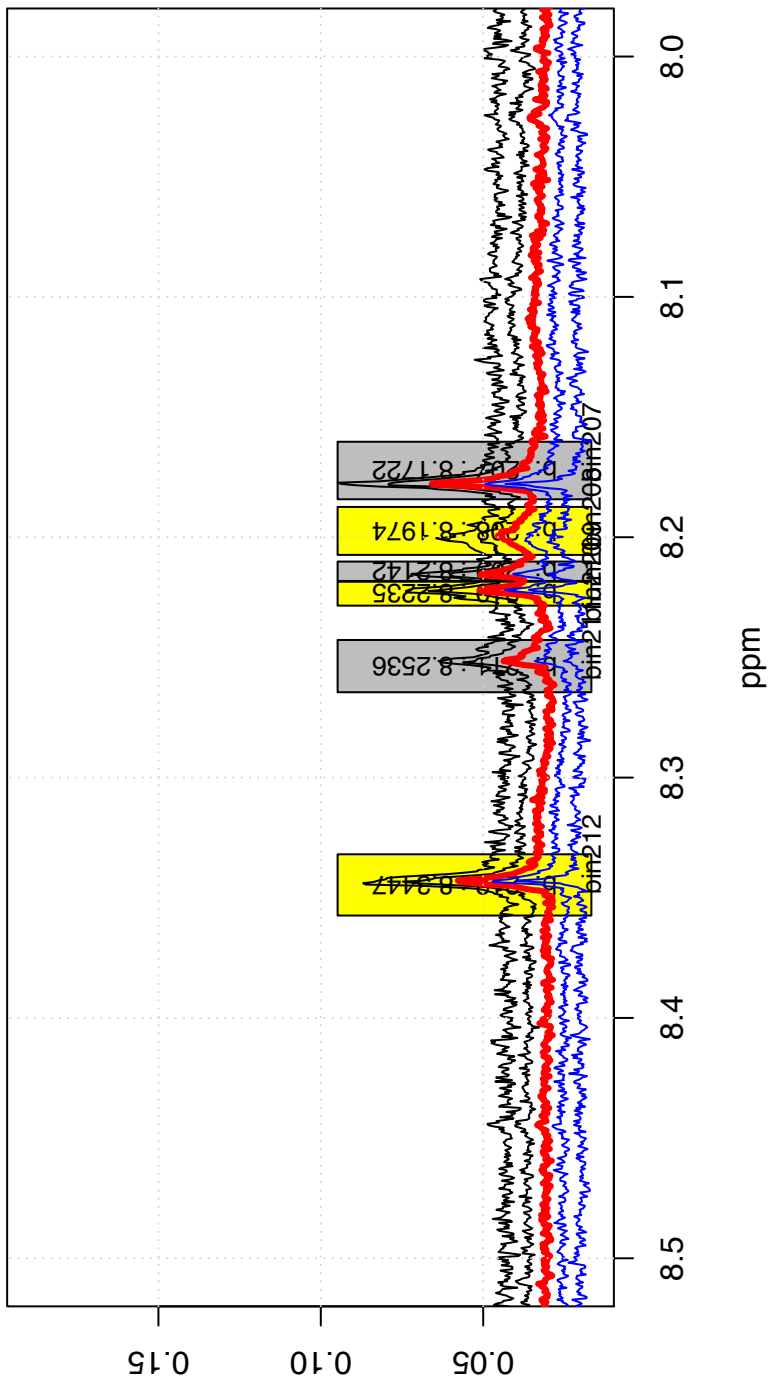

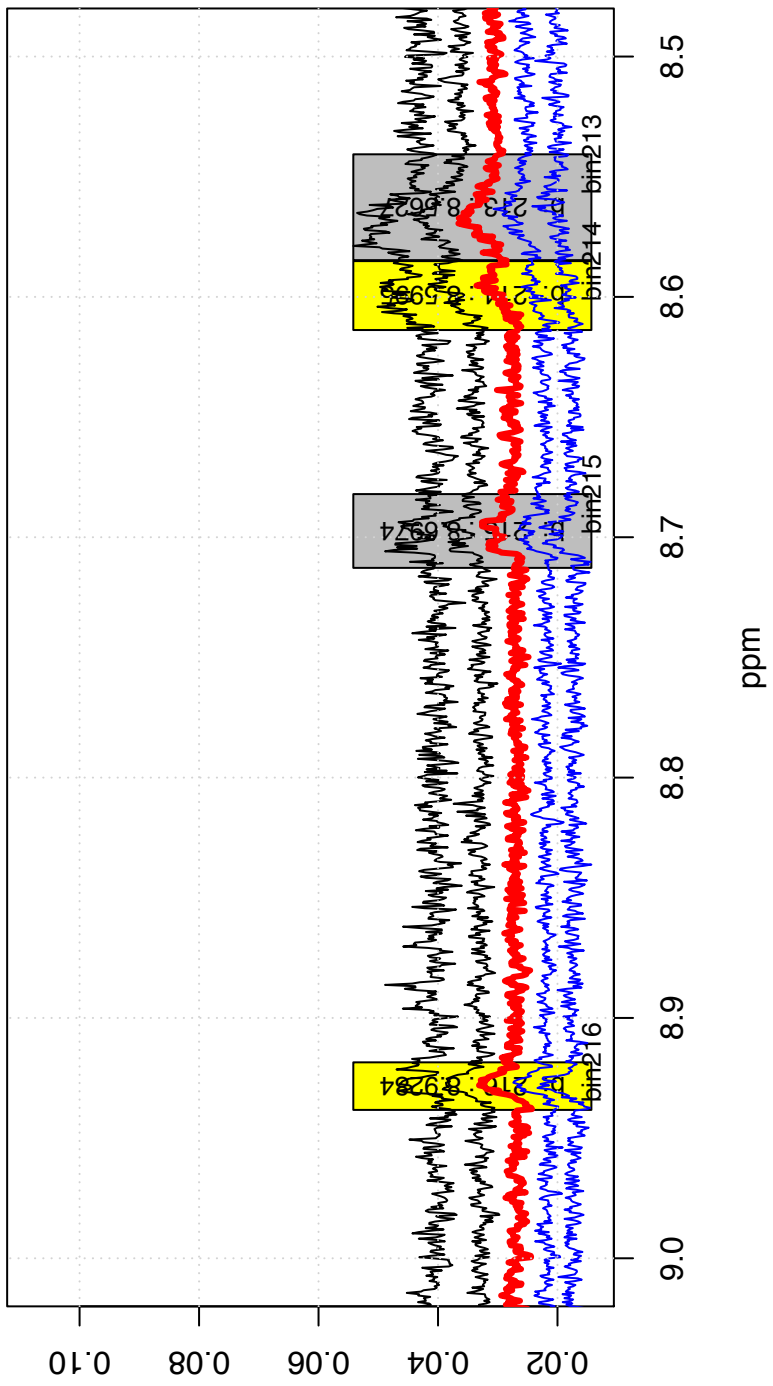

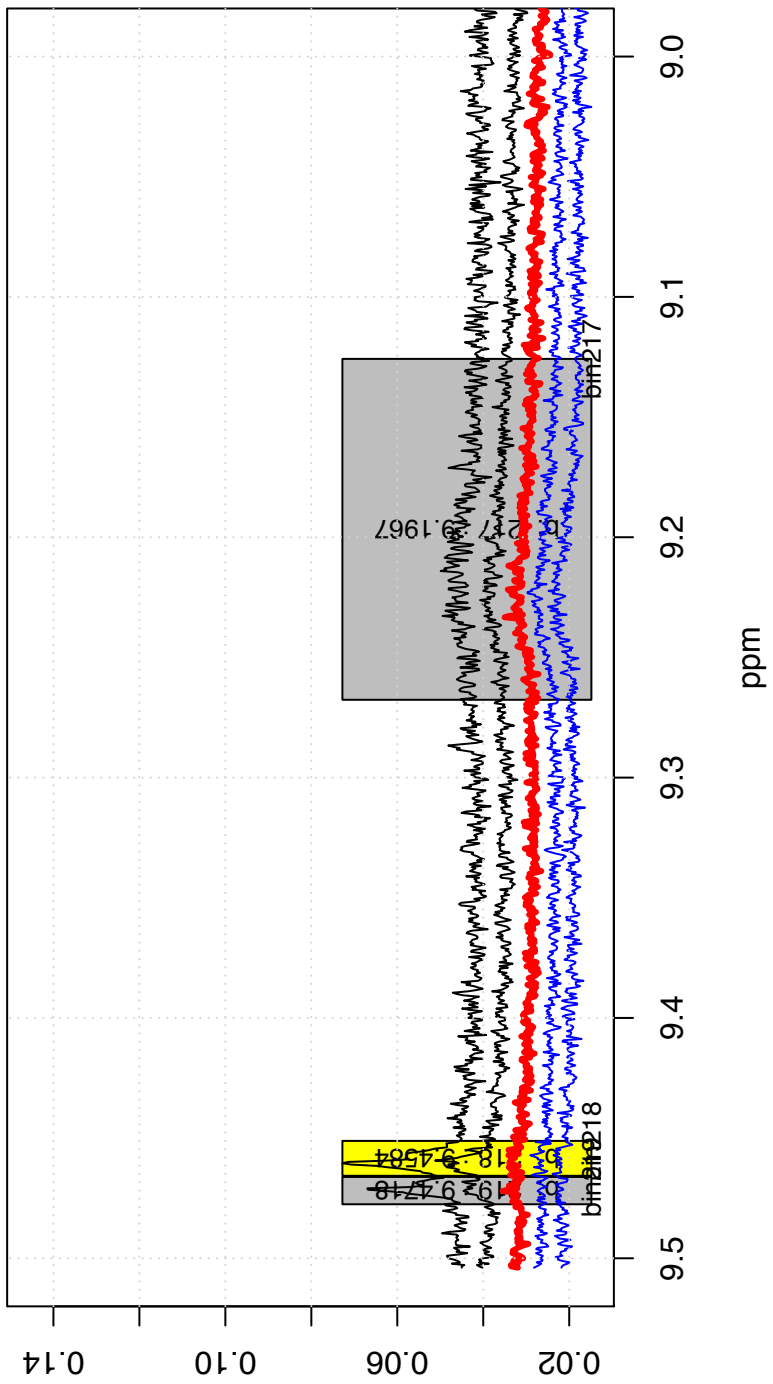

## CPMG SPECTRA

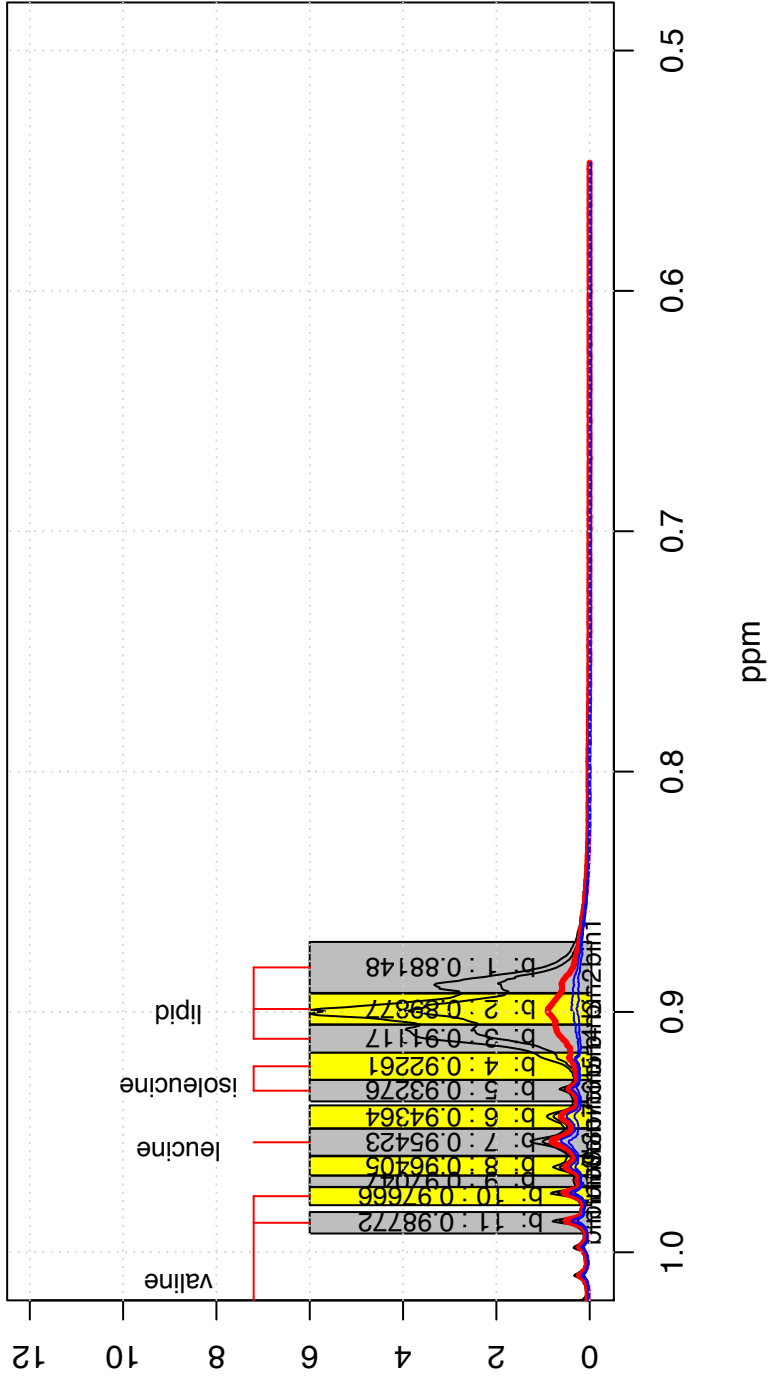

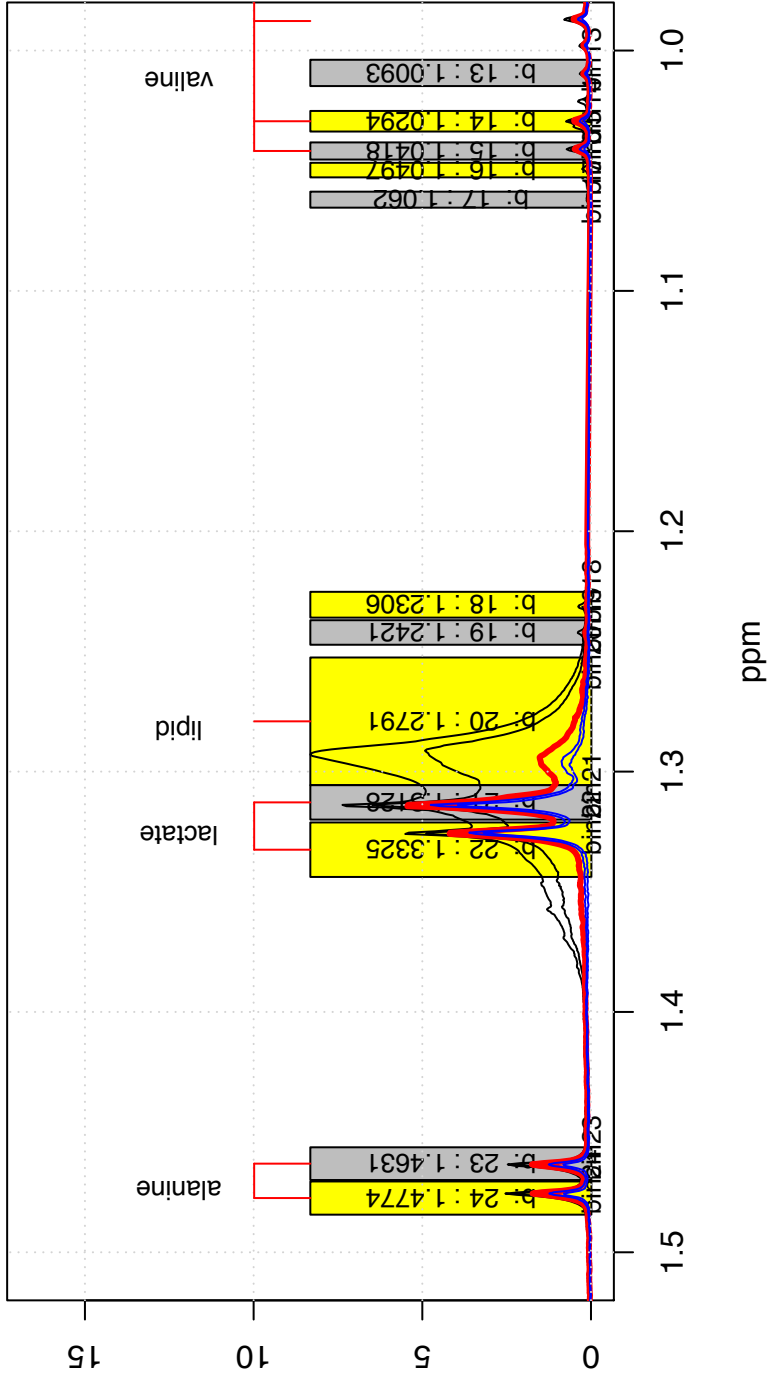

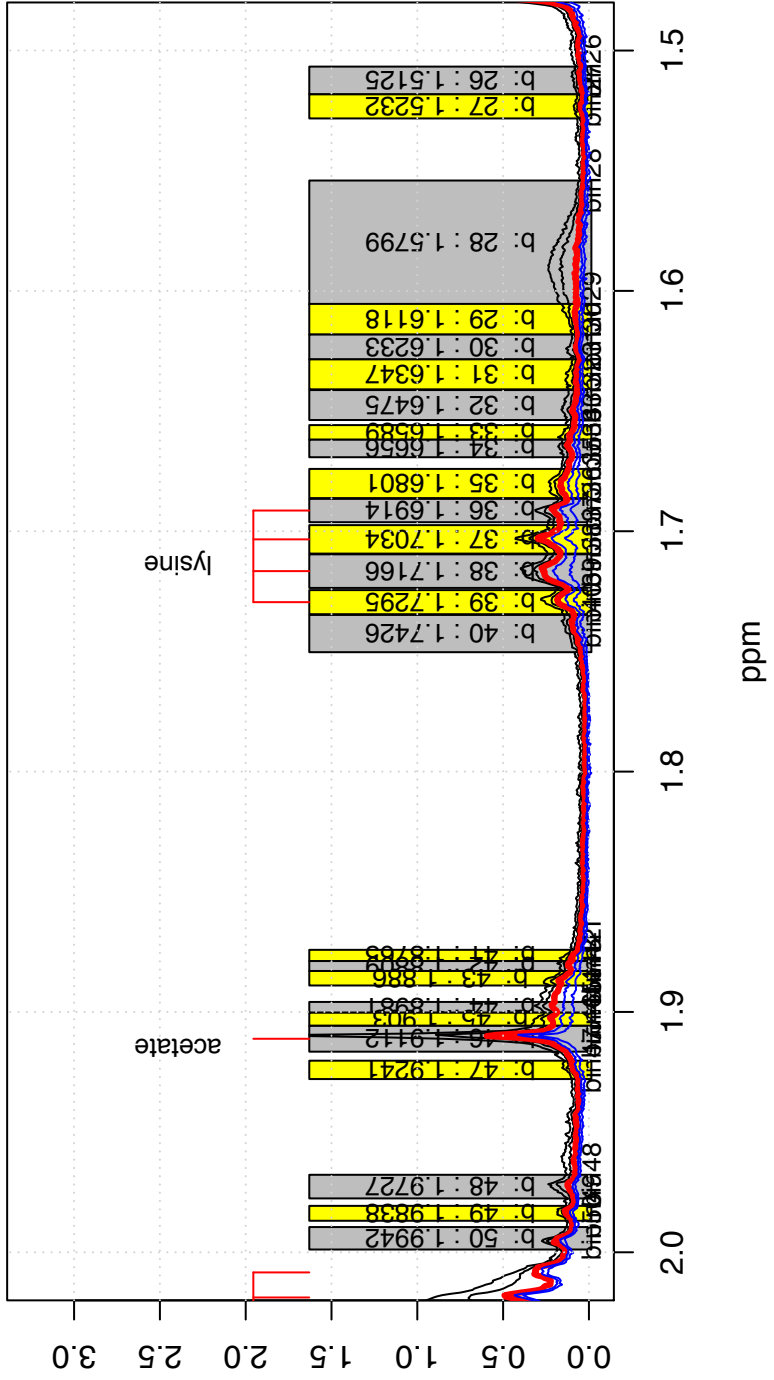



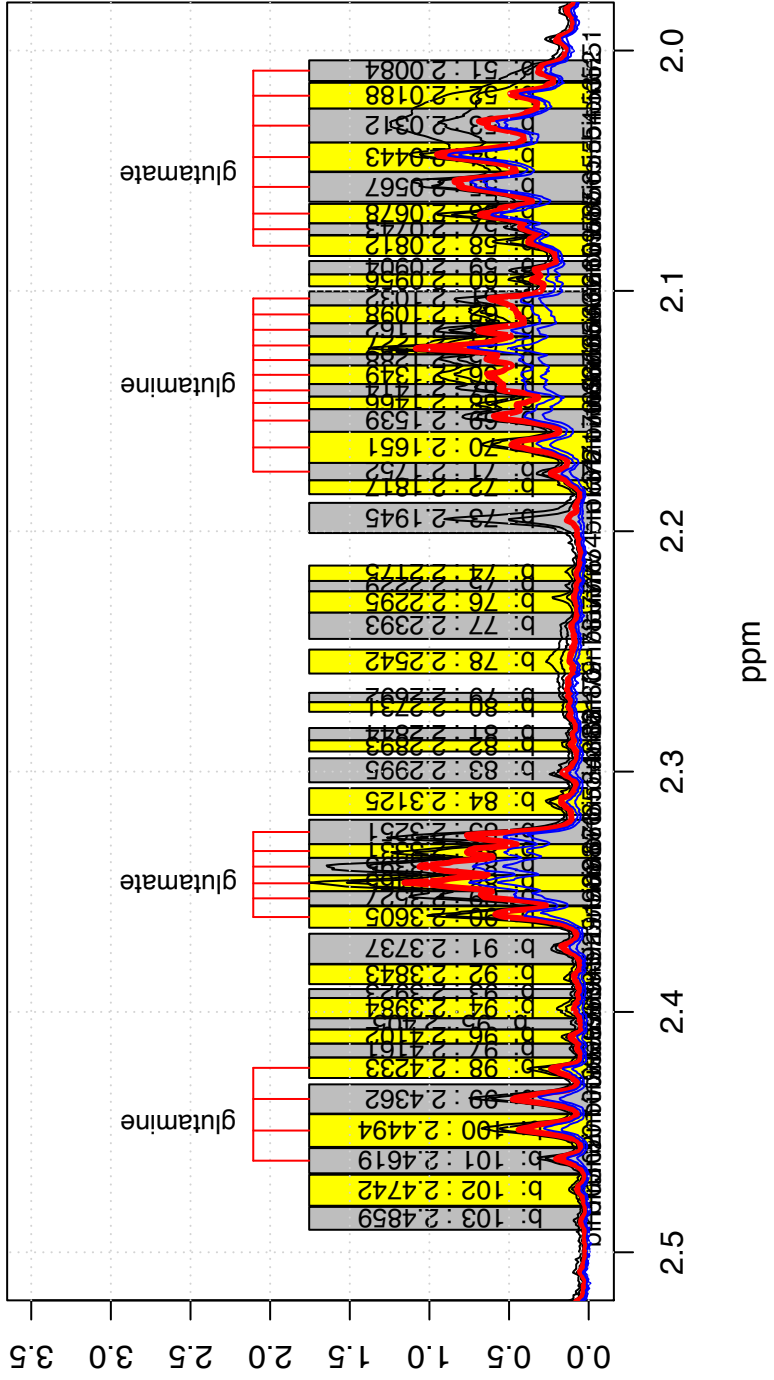

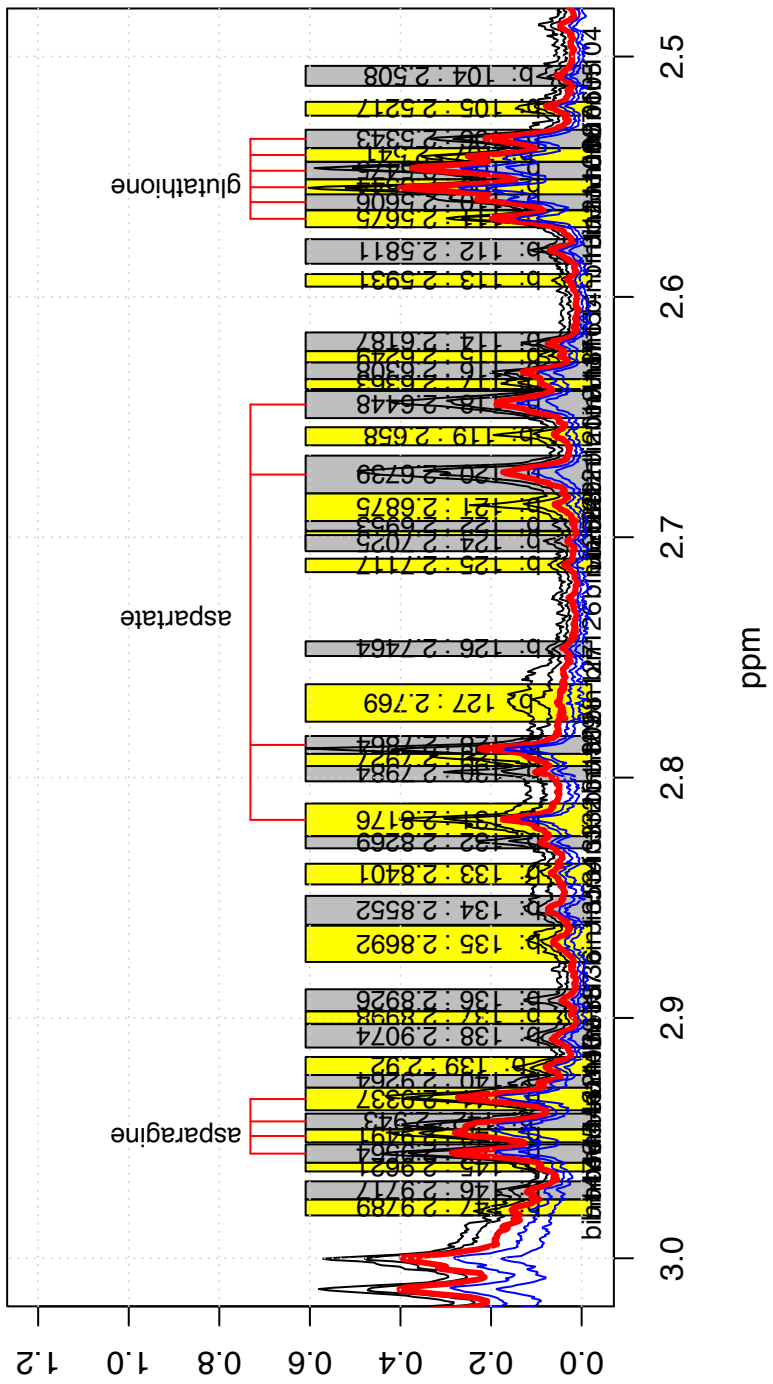

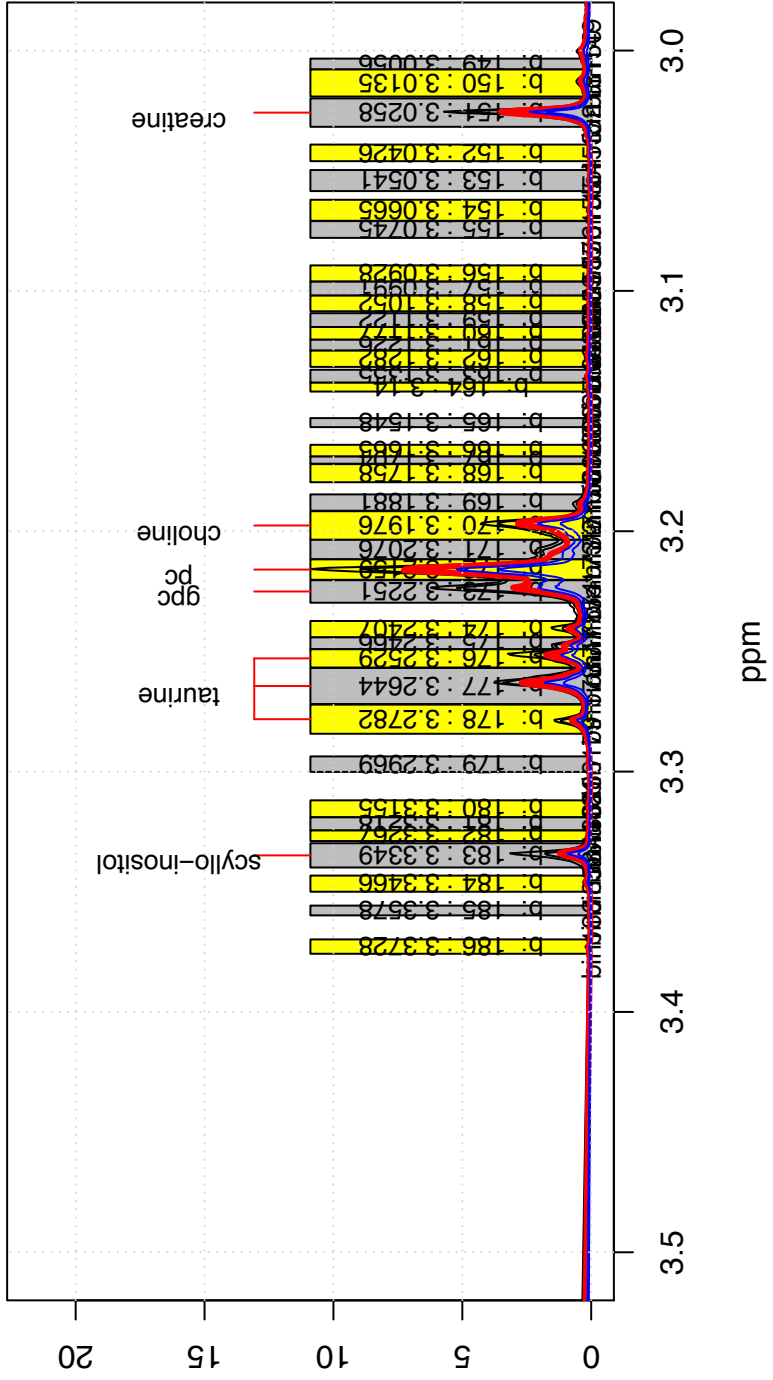

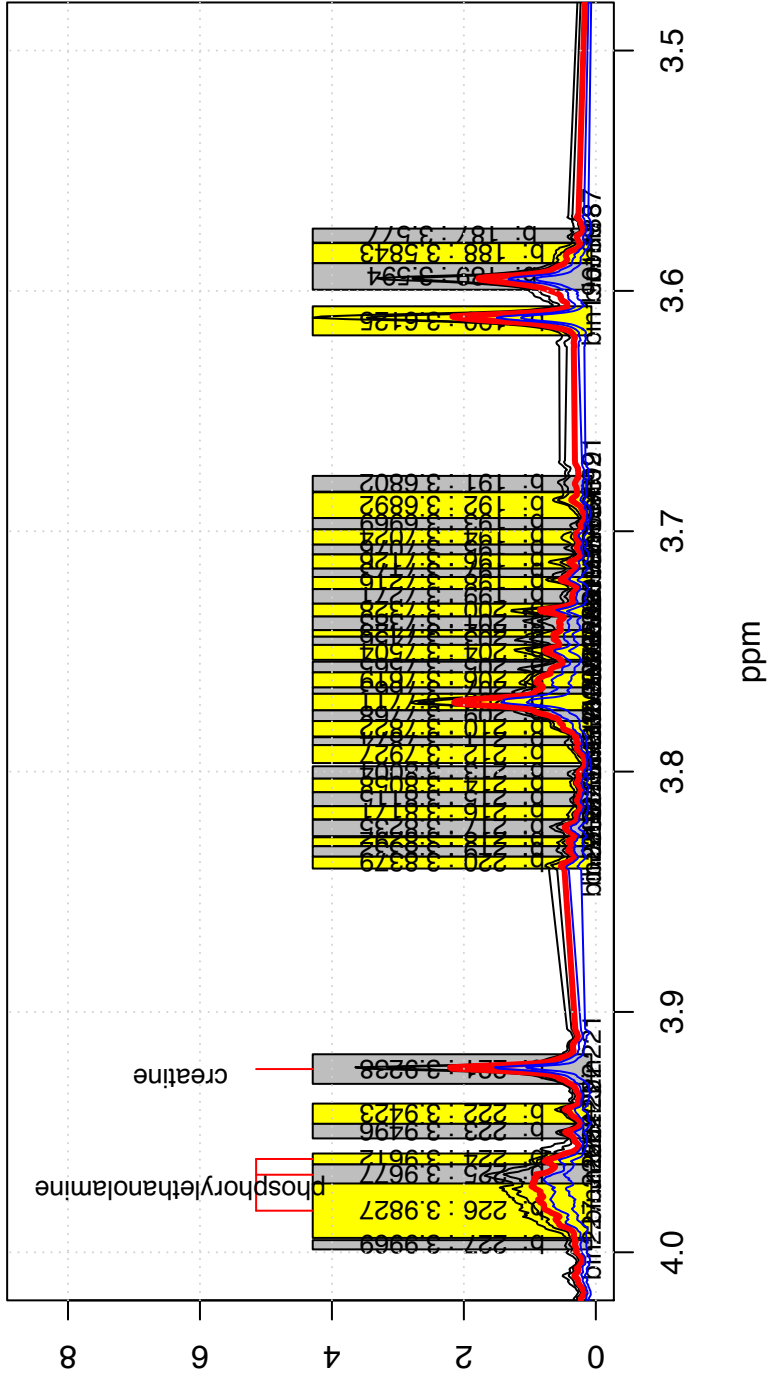

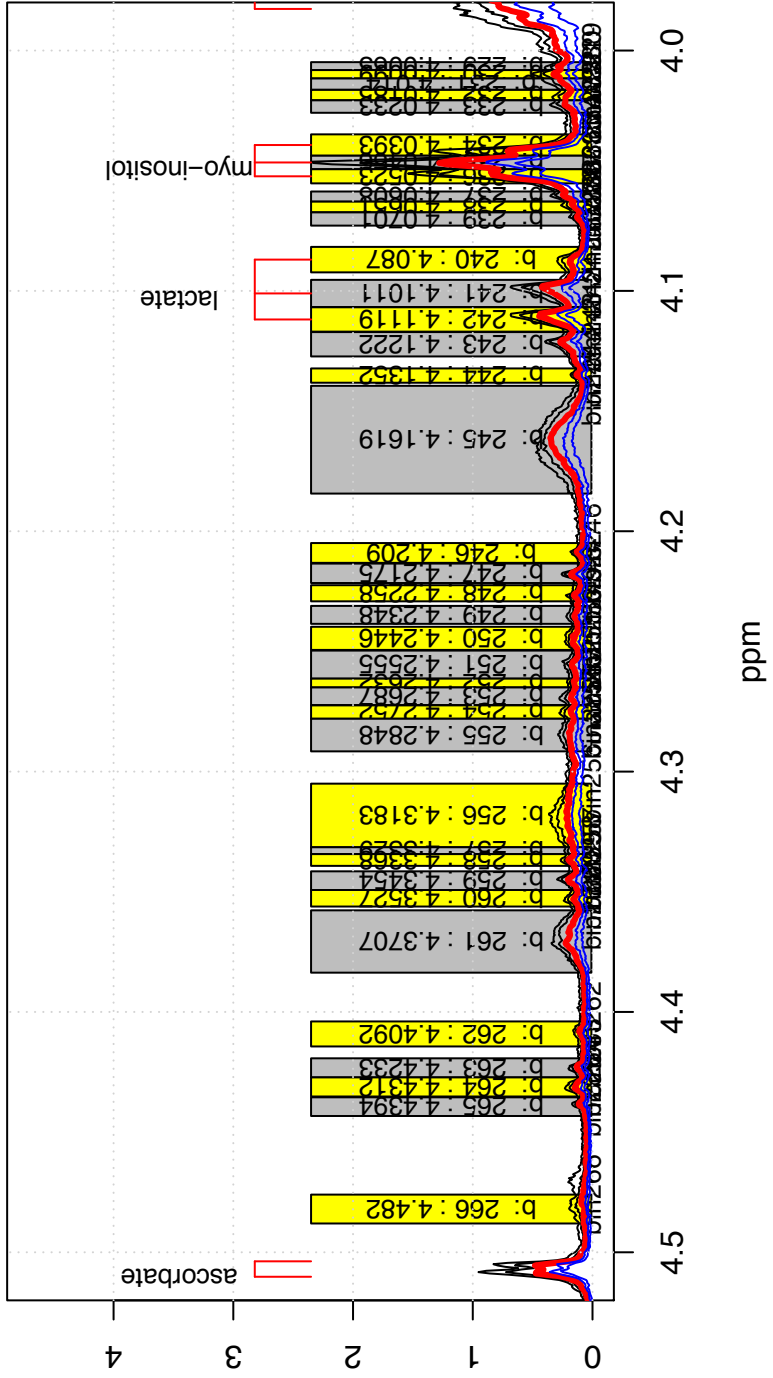

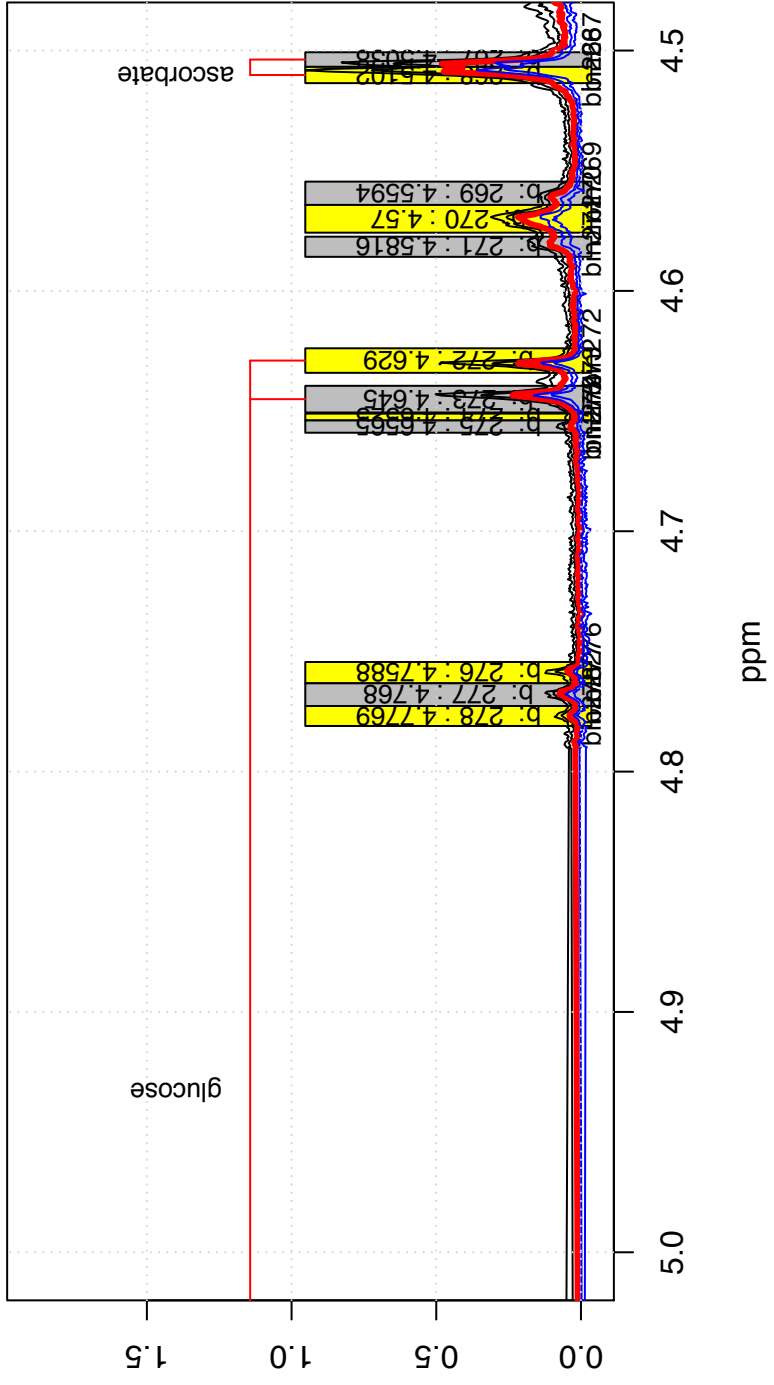

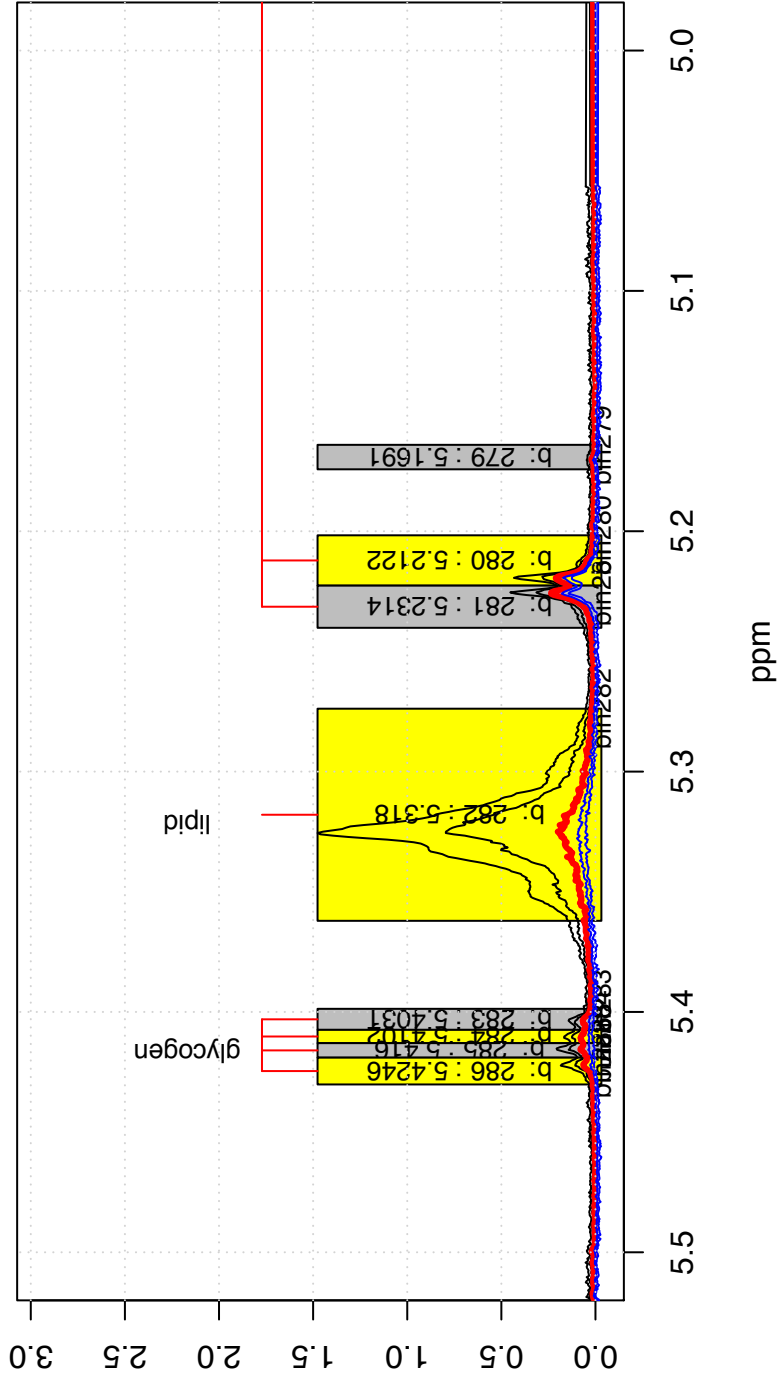

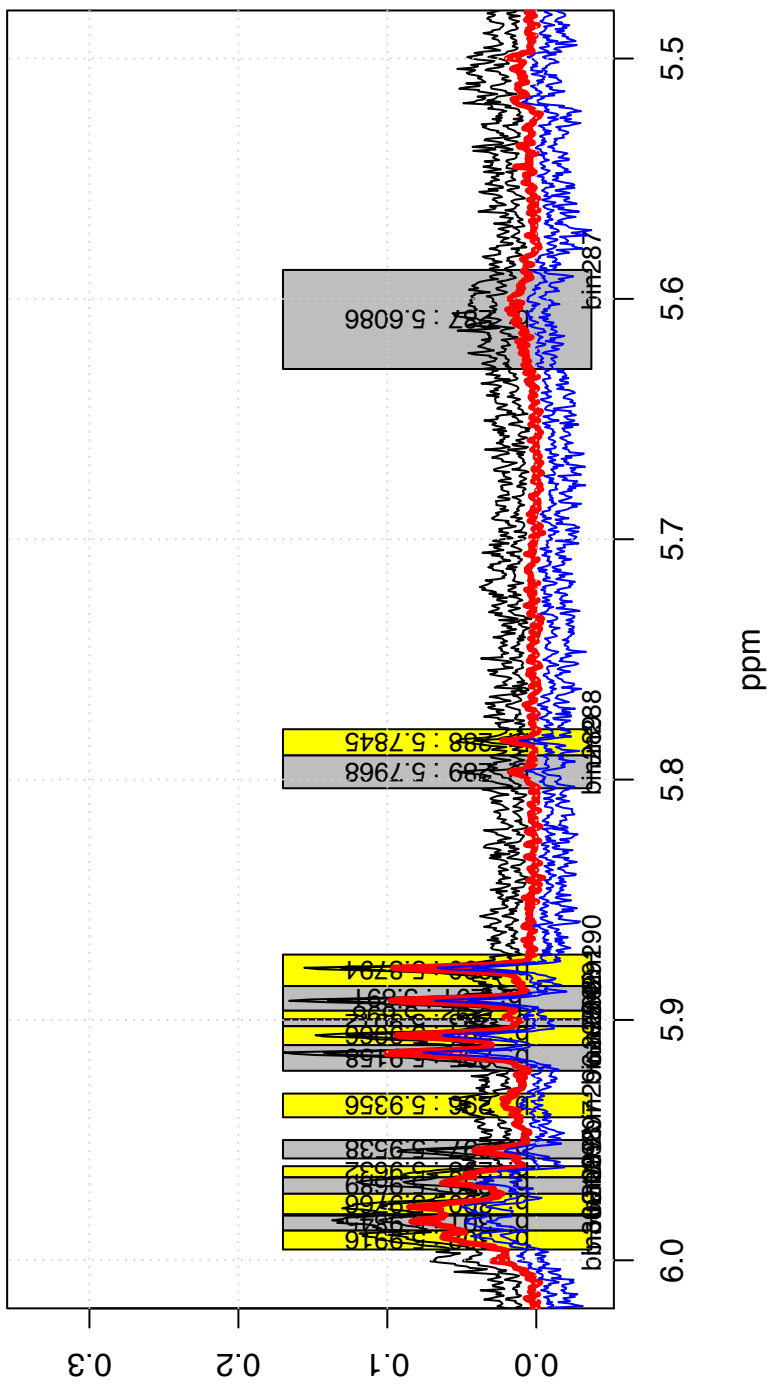



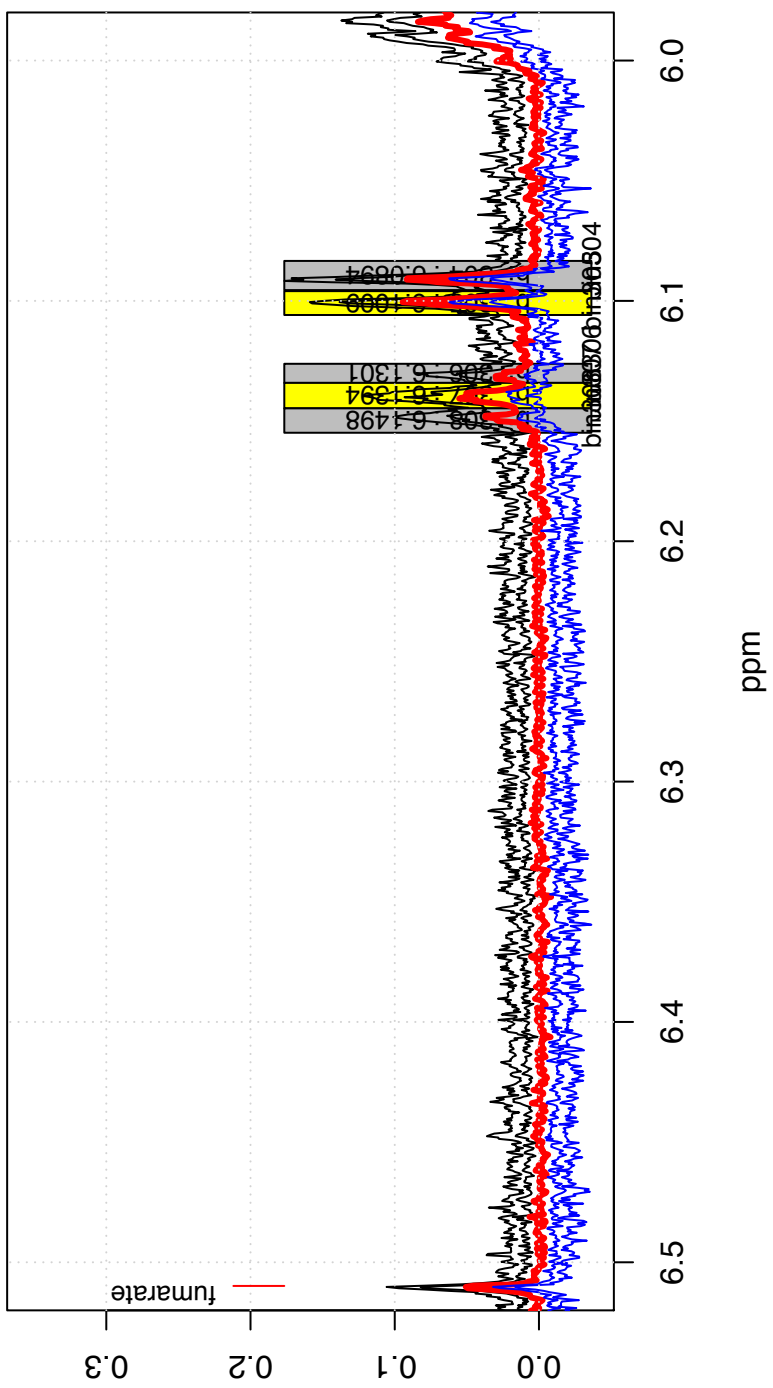

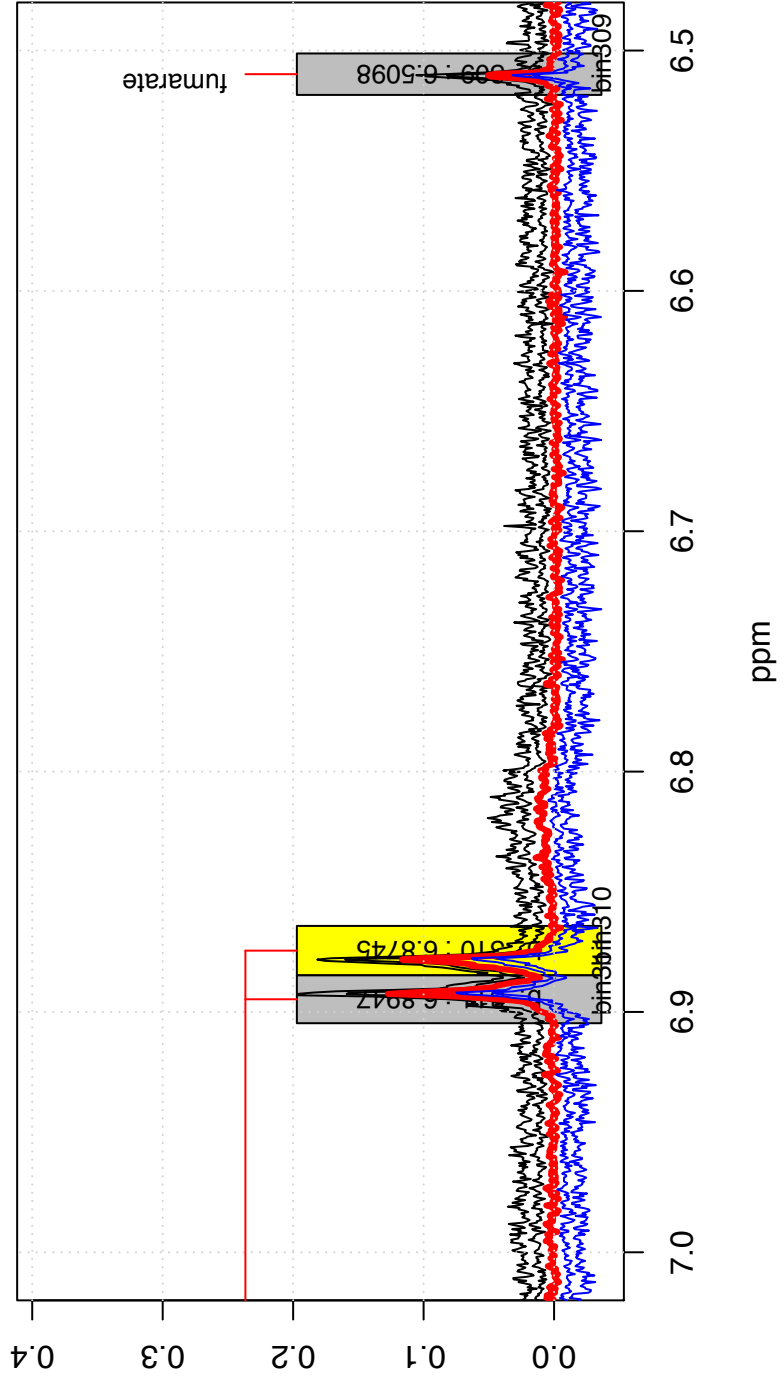

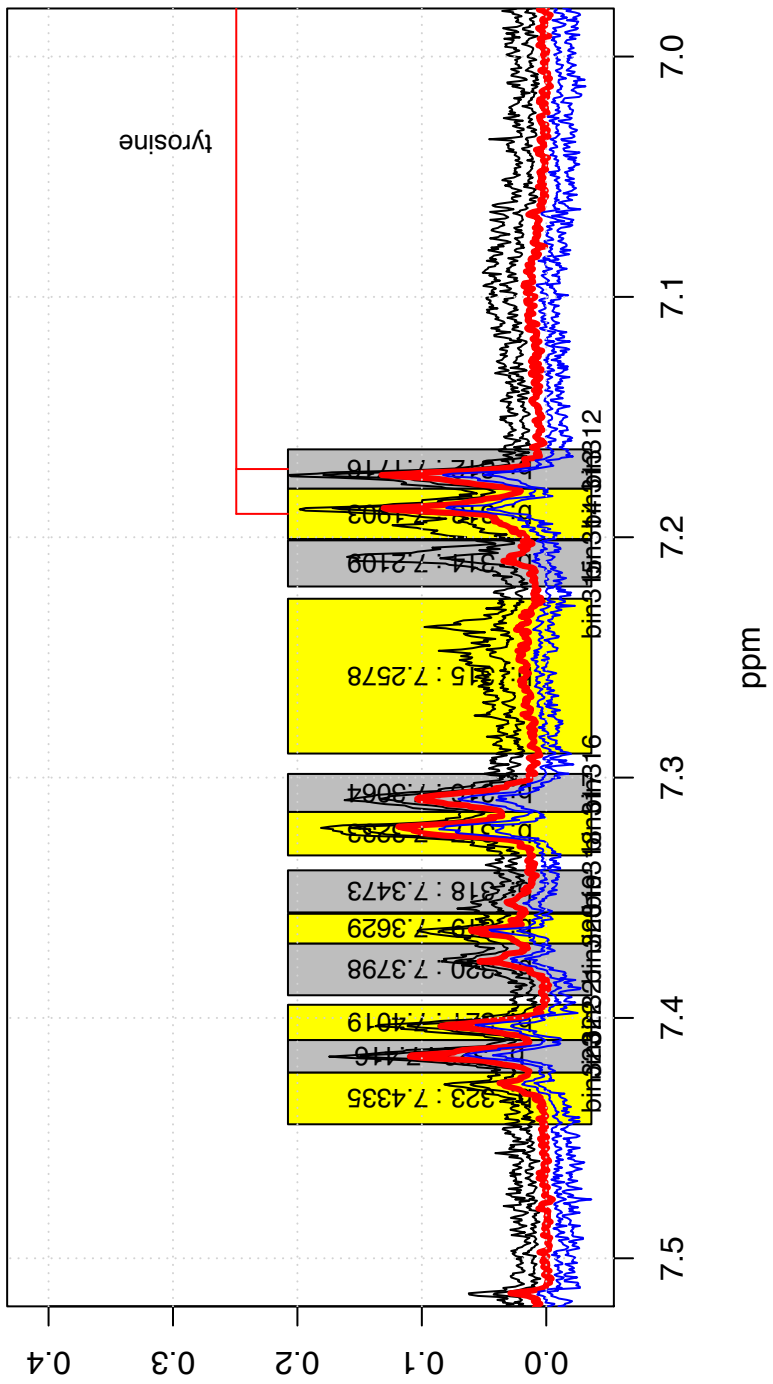

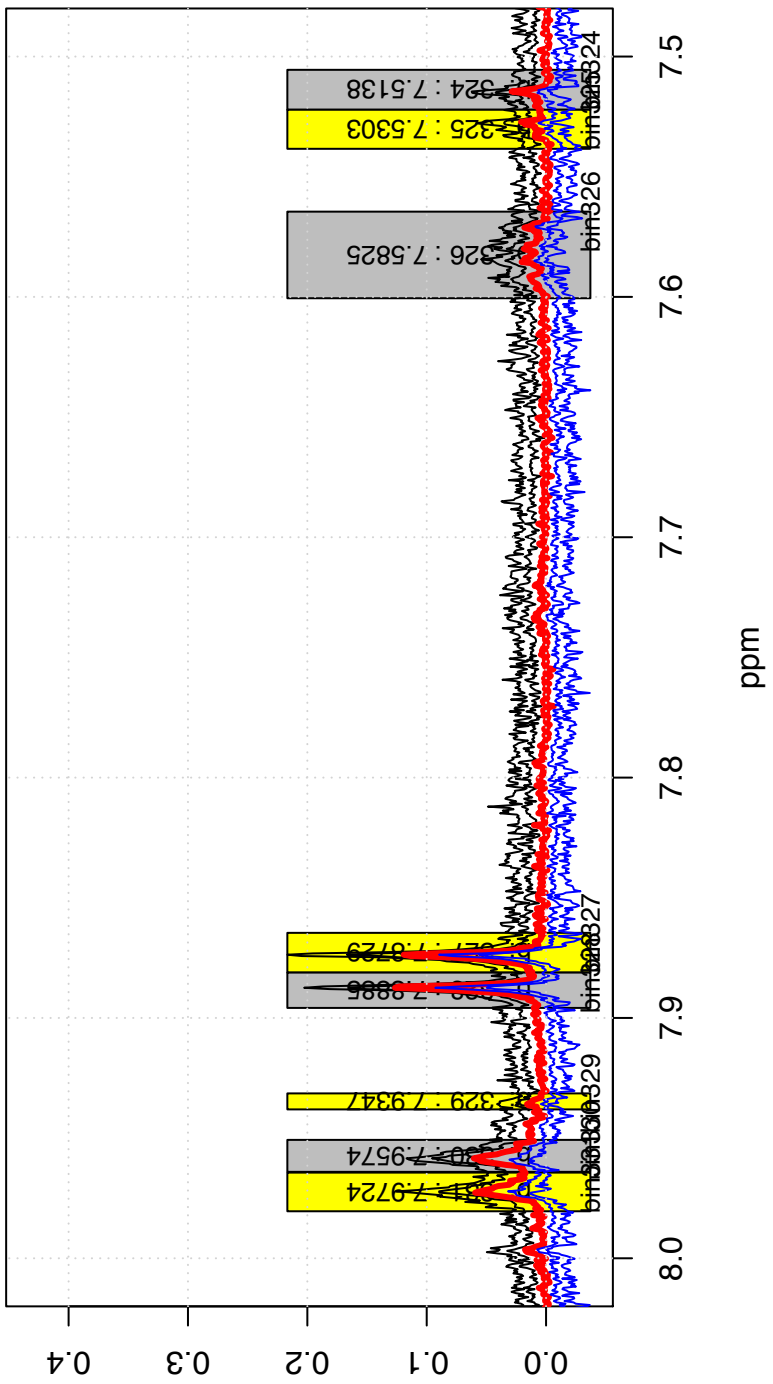

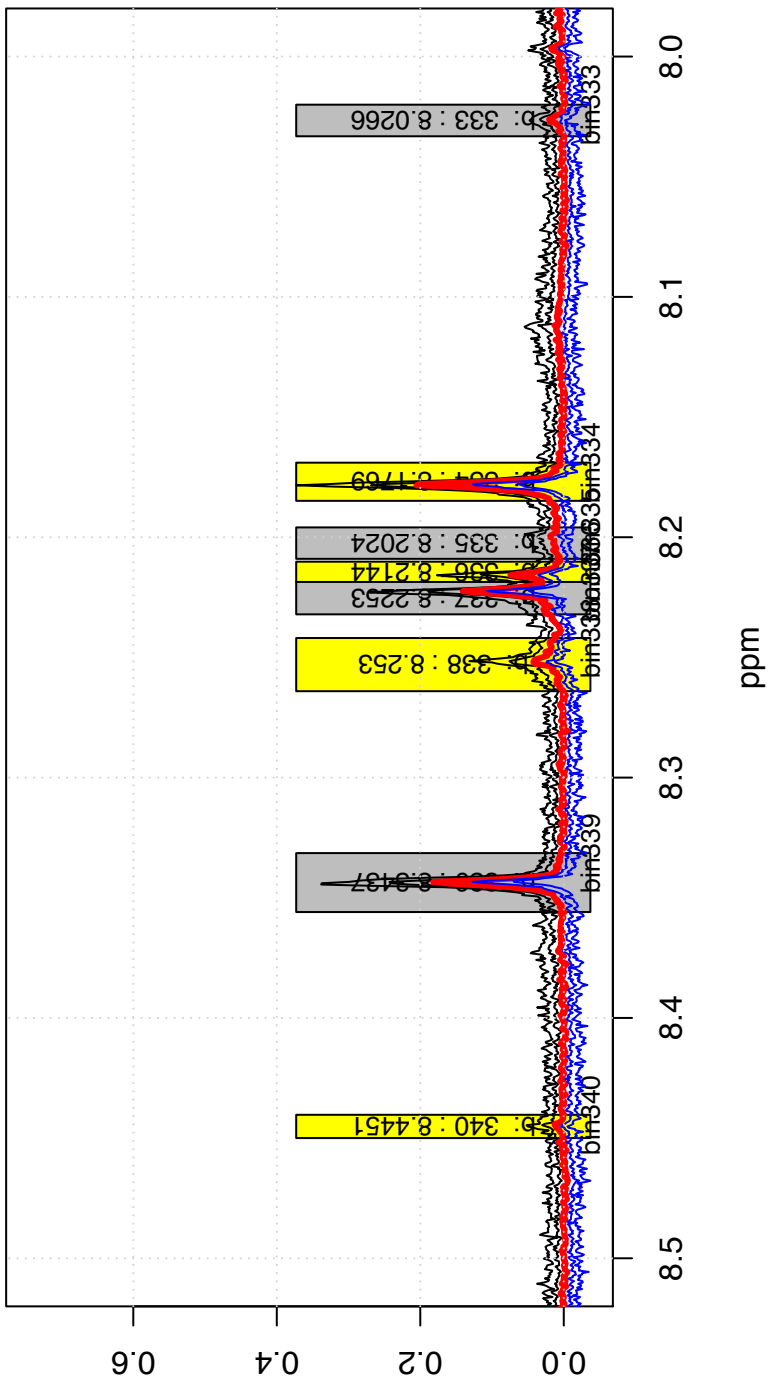

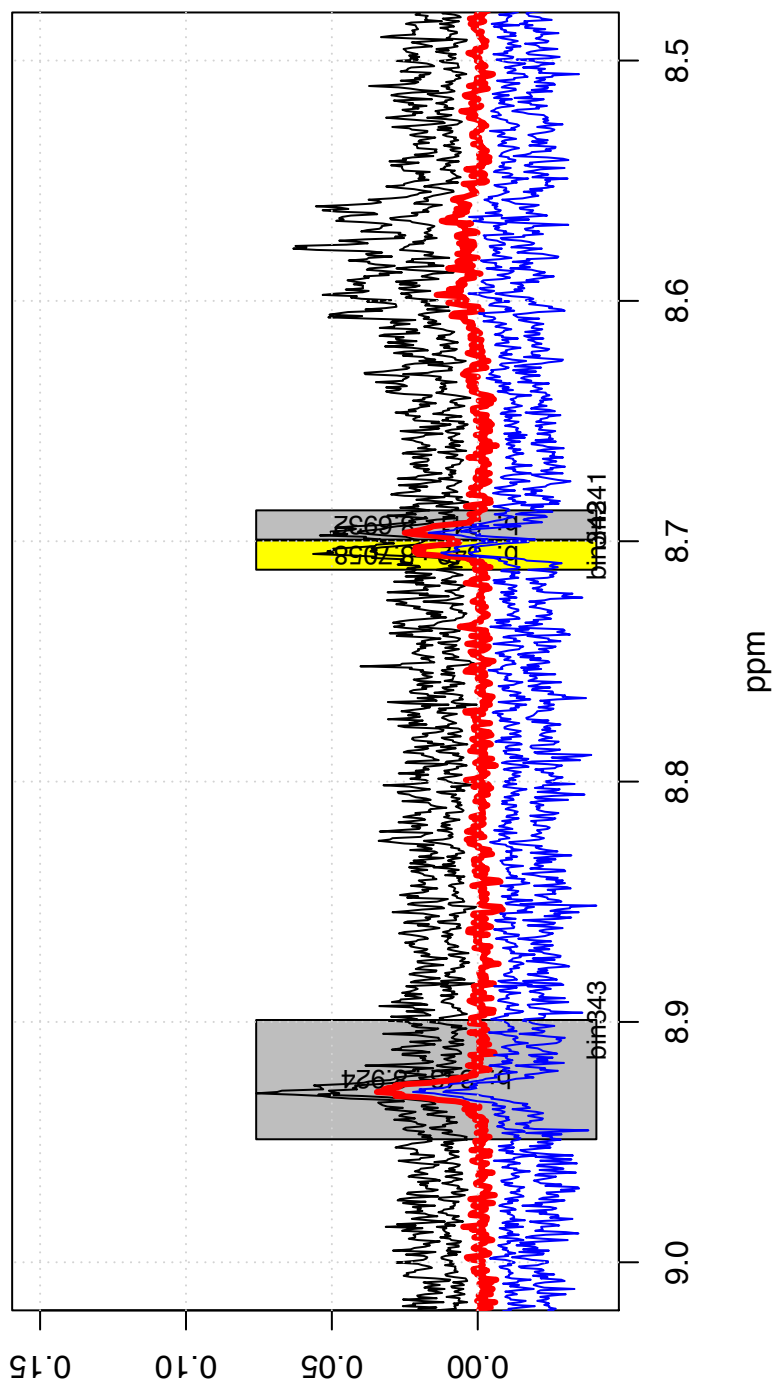

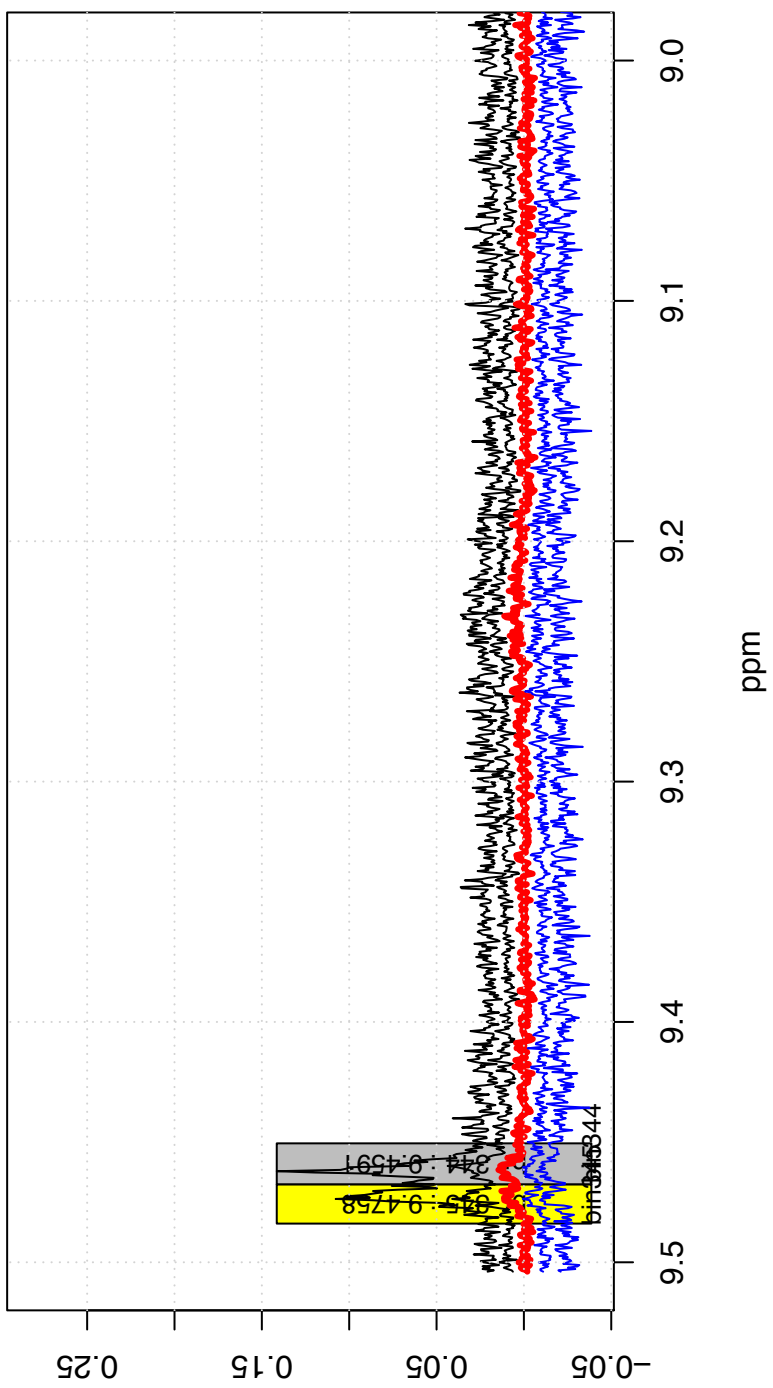

Supplement: 11306_2013_580_MOESM2_ESM.pdf [file 11306_2013_580_MOESM2_ESM.pdf]
